# Supplementary material for: A Systems Biology Approach to Characterize the Regulatory Networks Leading to Trabectedin Resistance in an In Vitro Model of Myxoid Liposarcoma
Source: PLoS One. 2012 Apr 16;7(4):e35423. doi: 10.1371/journal.pone.0035423 (PMC3327679; doi:10.1371/journal.pone.0035423)
Supplement: Table S4 — Complete list of differentially expressed proteins. (XLSX) [file pone.0035423.s005.xlsx]

## Sheet: Sheet1
ID	Name	RefSeq accessions	Entrez Gene ID	logFC	P.Value	adj.P.Val
P4868	p53DINP1SIP	NM_001135733, NM_033285, NP_001129205, NP_150601	94241	0.962773	0.0117558	0.045667
N2786	Nedd8	NM_006156, NP_006147	4738	0.837057	0.0118023	0.045667
P4993	P53R2			0.792603	0.012811	0.0473194
C8854	Caspase13			0.783988	0.0262866	0.0672468
S5188	SGK	NM_001143676, NM_001143677, NM_001143678, NM_005627, NP_001137148, NP_001137149, NP_001137150, NP_005618	6446	0.734318	0.0055909	0.0396025
T5942	14 3 3		646954	0.699971	0.0169487	0.0528302
G4170	GRP75	NM_004134, NP_004125	3313	0.697003	0.00743291	0.0396025
D3563	DR3	NM_001039664, NM_003790, NM_148965, NM_148966, NM_148967, NM_148970, NP_001034753, NP_003781, NP_683866, NP_683867, NP_683868, NP_683871	8718	0.679719	0.00803216	0.0397872
P5243	PERP	NM_022121, NP_071404	64065	0.675683	0.000714456	0.0396025
M9934	MyD88	NM_001172566, NM_001172567, NM_001172568, NM_001172569, NM_002468, NP_001166037, NP_001166038, NP_001166039, NP_001166040, NP_002459	4615	0.671347	0.039803	0.0820456
N5162	NeurabinII	NM_032595, NP_115984	84687	0.655945	0.00127785	0.0396025
D1564	DR6	NM_014452, NP_055267	27242	0.653551	0.0137132	0.0492289
A8469	Apaf1	NM_001160, NM_013229, NM_181861, NM_181868, NM_181869, NP_001151, NP_037361, NP_863651, NP_863658, NP_863659	317	0.652905	0.00569994	0.0396025
Z0134	Zip Kinase	NM_001348, NP_001339	1613	0.652736	0.0242438	0.064549
D3566	DcR1	NM_003841, NP_003832	8794	0.6409	0.00787092	0.0396025
D1814	DcR3	NM_003823, NM_032945, NP_003814, NP_116563	8771	0.616328	0.0263043	0.0672468
S3056	SHPTP2	NM_002834, NP_002825	5781	0.616141	0.00368257	0.0396025
M5683	MADD			0.613849	0.0300678	0.072081
P4618	PUMA bbc3	NM_001127240, NM_001127241, NM_001127242, NM_014417, NP_001120712, NP_001120713, NP_001120714, NP_055232	27113	0.606008	0.00215143	0.0396025
T1323	e Tubulin	NM_016262, NP_057346	51175	0.600047	0.0201032	0.0578646
Y1253	Y14	NM_005105, NP_005096	9939	0.585763	0.0144328	0.0501227
R3779	RbAp48 RbAp46			0.559149	0.0245675	0.0651395
R7904	Rab5	NM_004162, NP_004153	5868	0.54898	0.023088	0.0625137
D3191	DAP Kinase 2	NM_014326, NP_055141	23604	0.546731	0.0183795	0.0546256
D3938	DR5	NM_003842, NM_147187, NP_003833, NP_671716, NR_027140	8795	0.546607	0.00355196	0.0396025
M8432	p38 MAP Kinase NonActivated			0.538715	0.0149639	0.0505216
F3428	F1A	NM_015322, NP_056137	10116	0.52213	0.0182844	0.0545968
H5912	phosphoHistone H2AX pSer139			0.517829	0.00137223	0.0396025
S8945	Syntaxin 8			0.515269	0.00856556	0.0405436
V2139	VDAC Porin			0.514802	0.0037172	0.0396025
N5287	Nuf2	NM_031423, NM_145697, NP_113611, NP_663735	83540	0.50652	0.0296037	0.0716544
P5999	Prion Protein			0.482816	0.0105083	0.045667
N4412	Neurabin I			0.479719	0.0236794	0.0635762
R6775	Retinoblastoma	NM_000321, NP_000312	5925	0.477433	0.00710594	0.0396025
O0138	OP18 Stathmin	NM_001145454, NM_005563, NM_203399, NM_203401, NP_001138926, NP_005554, NP_981944, NP_981946	3925	0.476124	0.00179095	0.0396025
H6412	HDAC8	NM_001166418, NM_001166419, NM_001166420, NM_001166422, NM_001166448, NM_018486, NP_001159890, NP_001159891, NP_001159892, NP_001159894, NP_001159920, NP_060956	55869	0.470214	0.000983964	0.0396025
P8087	Plakoglobin Catenin g	NM_002230, NM_021991, NP_002221, NP_068831	3728	0.467447	0.0218816	0.0605297
B1684	Bmf			0.463418	0.00228457	0.0396025
M0800	p38 MAPK			0.462985	0.00118972	0.0396025
A1726	APRIL	NM_001198622, NM_001198623, NM_001198624, NM_003808, NM_172087, NM_172088, NP_001185551, NP_001185552, NP_001185553, NP_003799, NP_742084, NP_742085	8741	0.459963	0.00264706	0.0396025
B7929	Bim	NM_001204106, NM_001204107, NM_001204108, NM_001204109, NM_001204110, NM_001204111, NM_001204112, NM_001204113, NM_006538, NM_138621, NM_138622, NM_138623, NM_138624, NM_138625, NM_138626, NM_138627, NM_207002, NM_207003, NP_001191035, NP_001191036, NP_001191037, NP_001191038, NP_001191039, NP_001191040, NP_001191041, NP_001191042, NP_006529, NP_619527, NP_619528, NP_619529, NP_619530, NP_619531,…	10018	0.452999	0.00487145	0.0396025
R2404	Raf1cRaf			0.452297	0.0147445	0.0503535
D0188	DNASE I			0.440268	0.0054558	0.0396025
P9489	p35 Cdk5 Regulator			0.439606	0.00729982	0.0396025
D3316	DEDAF			0.436497	0.0042114	0.0396025
N5411	S Nitrosocysteine			0.430301	0.00675972	0.0396025
E2520	Epidermal Growth Factor	NM_001178130, NM_001178131, NM_001963, NP_001171601, NP_001171602, NP_001954	1950	0.422173	0.011413	0.045667
S4445	Sin3A			0.422007	0.0360031	0.0787876
C0354	p130CAS			0.421816	0.00740891	0.0396025
M3566	MTBP	NM_022045, NP_071328	27085	0.419616	0.00745202	0.0396025
R8653	ROCK2			0.399001	0.0088443	0.0415552
F1554	FXR2	NM_004860, NP_004851	9513	0.396968	0.0107958	0.045667
F9925	FLIPg d			0.38612	0.00269843	0.0396025
N5037	Neurabin II	NM_032595, NP_115984	84687	0.383835	0.00521812	0.0396025
G4420	GRP94			0.383435	0.0407468	0.0831185
R4777	Ran	NM_006325, NP_006316	5901	0.382855	0.0348296	0.0769346
R6028	ROCK1	NM_005406, NP_005397	6093	0.379362	0.0058196	0.0396025
V2639	VGLUT 2	NM_020346, NP_065079	57084	0.372068	0.0011518	0.0396025
P3987	Protein Kinase D	NM_002742, NP_002733	5587	0.364554	0.00411211	0.0396025
I4782	ILP2	NM_033341, NP_203127	112401	0.360036	0.00832548	0.0399999
N2911	Nck2			0.356592	0.0154966	0.0505216
S5196	Sirt1			0.352543	0.0035707	0.0396025
H9161	Acetyl phospho Histone H3 AL9 S10	NM_021018, NP_066298	8968	0.350581	0.0144166	0.0501227
M3682	MAP Kinase Monophosphorylated Tyrosine			0.348804	0.0191934	0.056049
S2644	S100			0.343732	0.00560119	0.0396025
S2177	Synaptotagmin			0.339221	0.0029711	0.0396025
W3516	WSTF			0.339045	0.0489846	0.0966085
S3062	aSynuclein			0.33867	0.0171596	0.0528731
D1314	DRAK1	NM_004760, NP_004751	9263	0.336537	0.0170501	0.0528731
A8354	bAmyloid	NM_000484, NM_001136016, NM_001136129, NM_001136130, NM_001136131, NM_001204301, NM_001204302, NM_001204303, NM_201413, NM_201414, NP_000475, NP_001129488, NP_001129601, NP_001129602, NP_001129603, NP_001191230, NP_001191231, NP_001191232, NP_958816, NP_958817	351	0.335255	0.00362657	0.0396025
T8300	Tumor Necrosis Factor a	NM_000594, NP_000585	7124	0.334706	0.0349155	0.0769346
S0696	Striatin			0.333141	0.00539102	0.0396025
M8440	MCH	NM_002674, NP_002665	5367	0.331003	0.0115709	0.045667
P4749	PAD14	NM_012387, NP_036519	23569	0.321413	0.0026573	0.0396025
P2610	p14 arf	NM_000077, NM_001195132, NM_058195, NM_058197, NP_000068, NP_001182061, NP_478102, NP_478104	1029	0.320989	0.00768755	0.0396025
P6248	Parkin	NM_004562, NM_013987, NM_013988, NP_004553, NP_054642, NP_054643	5071	0.319428	0.0328192	0.0738433
S9442	Synaptopodin			0.318614	0.0066801	0.0396025
P0244	PKR	NM_001135651, NM_001135652, NM_002759, NP_001129123, NP_001129124, NP_002750	5610	0.3145	0.014067	0.0498377
G6541	GRP1			0.310793	0.00424624	0.0396025
P2735	p57kip2	NM_000076, NM_001122630, NM_001122631, NP_000067, NP_001116102, NP_001116103	1028	0.309766	0.0310138	0.072081
P9371	PINCH1			0.308072	0.00461168	0.0396025
F1672	Fibroblast Growth Factor9	NM_002010, NP_002001	2254	0.30804	0.00718529	0.0396025
N7782	Nitric Oxide Synthase Inducible iNOS			0.307977	0.037973	0.0806163
P7979	Protein phosphatase 1a	NM_001008709, NM_002708, NM_206873, NP_001008709, NP_002699, NP_996756	5499	0.302991	0.00369455	0.0396025
U5258	Ubiquitin Cterminal Hydrolase L1			0.300059	0.0104403	0.045667
H6788	Heat Shock Factor 2			0.299658	0.0218355	0.0605297
P1870	p120ctn	NM_001085458, NM_001085459, NM_001085460, NM_001085461, NM_001085462, NM_001085463, NM_001085464, NM_001085465, NM_001085466, NM_001085467, NM_001085468, NM_001085469, NM_001331, NP_001078927, NP_001078928, NP_001078929, NP_001078930, NP_001078931, NP_001078932, NP_001078933, NP_001078934, NP_001078935, NP_001078936, NP_001078937, NP_001078938, NP_001322	1500	0.293784	0.0165661	0.0525564
P6623	Phosphothreonine			0.284826	0.0119571	0.045752
H6409	Histone H3 pSer10	NM_021018, NP_066298	8968	0.283954	0.00647487	0.0396025
M3787	MAP Kinase Phosphatase1 MKP1			0.282447	0.00565687	0.0396025
S4813	a1 Syntrophin			0.277079	0.00963617	0.0439823
U5133	Ubiquitin C terminal Hydrolase L1			0.273864	0.0172107	0.0528731
A9981	AP2 alpha	NM_001032280, NM_001042425, NM_003220, NP_001027451, NP_001035890, NP_003211	7020	0.271299	0.0441882	0.0882383
K4263	Kaiso			0.267314	0.0114545	0.045667
I0783	ILK			0.265043	0.00758147	0.0396025
O6264	OGlcNAc Transferase			0.260852	0.0191908	0.056049
M2444	MDC1	NM_014641, NP_055456	9656	0.258118	0.00671661	0.0396025
H2289	HSP 27 25			0.255413	0.0287078	0.0702846
G7670	GRK2			0.250068	0.0125784	0.0473194
H2537	HDAC7			0.249305	0.00569016	0.0396025
P6871	PRMT1			0.245887	0.015097	0.0505216
V0389	VGLUT1	NM_020309, NP_064705	57030	0.241839	0.00777781	0.0396025
C0224	Cdc6	NM_001254, NP_001245	990	0.238553	0.026215	0.0672468
P4555	Protein S	NM_000313, NP_000304	5627	0.234746	0.0260682	0.0672468
J3774	JAK1			0.233268	0.033153	0.0740727
P3118	p115 TAP			0.232442	0.0126115	0.0473194
K3513	KIF3A	NM_007054, NP_008985	11127	0.231523	0.00687107	0.0396025
P3237	PAK1pThr212	NM_001128620, NM_002576, NP_001122092, NP_002567	5058	0.230386	0.0075695	0.0396025
D3188	DcR2	NM_003840, NP_003831	8793	0.223539	0.0113581	0.045667
S4697	Seladin	NM_014762, NP_055577	1718	0.22117	0.0292252	0.0712783
P1498	Heat Shock Protein 27			0.218955	0.0217115	0.0605297
M7568	MBD2a			0.218714	0.00919537	0.0422723
M2694	Munc181			0.216261	0.0155675	0.0505216
O1136	Ornithine Decarboxylase			0.214652	0.0104877	0.045667
C3617	Casein Kinase 2b			0.210528	0.0277121	0.0691721
N2787	Neurofilament 160			0.206615	0.0491398	0.0966165
G6414	Glycogen Synthase Kinase3 GSK3			0.20553	0.0136652	0.0492289
P5747	Phosphoserine			0.202493	0.0227905	0.0619709
A4605	iASPP	NM_001142502, NM_006663, NP_001135974, NP_006654	10848	0.196453	0.0117243	0.045667
R6878	Retinoblastoma pSer795	NM_000321, NP_000312	5925	0.1928	0.0199413	0.0576584
N3037	NBS1			0.191329	0.0191005	0.056049
M8434	Mcl1			0.190855	0.0305718	0.072081
D1689	DNASE II	NM_001375, NP_001366	1777	0.187409	0.0519893	0.0988725
D5692	Dimethyl Histone H3 diMeLys4	NM_021018, NP_066298	8968	0.186492	0.0254654	0.0666901
C6979	Caspase 5	NM_001136109, NM_001136110, NM_001136112, NM_004347, NP_001129581, NP_001129582, NP_001129584, NP_004338, NR_024239, NR_036562	838	0.182248	0.0252872	0.0665963
F1054	FOXC2			0.182127	0.0365458	0.079162
C5588	Cyclin D1	NM_053056, NP_444284	595	0.180626	0.0205733	0.0583092
H2287	HDAC6			0.179542	0.0392737	0.0817255
V2764	Vanilloid Receptor1	NM_018727, NM_080704, NM_080705, NM_080706, NP_061197, NP_542435, NP_542436, NP_542437	7442	0.175127	0.0179434	0.0540841
P4112	PKB pSer473	NM_001014431, NM_001014432, NM_005163, NP_001014431, NP_001014432, NP_005154	207	0.174321	0.0320906	0.0729747
M3550	MAP Kinase Activated Protein Kinase2 MAP	NM_004759, NM_032960, NP_004750, NP_116584	9261	0.170082	0.0448853	0.0893511
I0505	IkB a			0.169592	0.0268565	0.0678311
A6104	ARP2	NM_001005386, NM_005722, NP_001005386, NP_005713	10097	0.168839	0.0408438	0.0831185
P3362	p63	NM_001114978, NM_001114979, NM_001114980, NM_001114981, NM_001114982, NM_003722, NP_001108450, NP_001108451, NP_001108452, NP_001108453, NP_001108454, NP_003713	8626	0.167343	0.038281	0.0806163
P7854	Presenilin1	NM_000021, NM_007318, NP_000012, NP_015557	5663	0.161112	0.0312299	0.072081
N9532	Nitric Oxide Synthase Endothelial eNOS			0.160534	0.0517878	0.0988725
C9108	Chk2	NM_001005735, NM_007194, NM_145862, NP_001005735, NP_009125, NP_665861	11200	0.15931	0.0294662	0.0715928
F6304	FOXP2	NM_001172766, NM_001172767, NM_014491, NM_148898, NM_148899, NM_148900, NP_001166237, NP_001166238, NP_055306, NP_683696, NP_683697, NP_683698, NR_033766, NR_033767	93986	0.15727	0.0311029	0.072081
H9286	Acetyl Histone H3 AcLys9	NM_021018, NP_066298	8968	0.156391	0.0286057	0.0702846
N1660	Nicastrin	NM_015331, NP_056146	23385	0.155457	0.0313592	0.072081
J4750	JNK Activated Diphosphorylated JNK	NM_002750, NM_139046, NM_139047, NM_139049, NP_002741, NP_620634, NP_620635, NP_620637	5599	0.153945	0.0362807	0.0789094
F8926	FAK pTyr577			0.152887	0.0518318	0.0988725
H4538	HDAC5			0.152507	0.0481589	0.095274
G8918	GRP78 BiP			0.149733	0.0431827	0.087322
L7917	LKB1	NM_000455, NP_000446	6794	0.142109	0.0386406	0.0807578
C8487	Caspase 3 Active	NM_004346, NM_032991, NP_004337, NP_116786	836	0.142022	0.0510263	0.0985069
M7194	MEKK4	NM_005922, NM_006724, NP_005913, NP_006715	4216	0.139966	0.0383527	0.0806163
M0819	MTA3L	NM_020744, NP_065795	57504	0.138565	0.0407356	0.0831185
R4904	Reelin			-0.139681	0.0382647	0.0806163
B9304	Bclx	NM_001191, NM_138578, NP_001182, NP_612815	598	-0.148018	0.0502161	0.0978295
N0409	Nitrotyrosin			-0.15177	0.0307611	0.072081
R5653	hnRNPQ			-0.153621	0.0335875	0.0745223
H7162	methyl Histone H3 MeLys9	NM_021018, NP_066298	8968	-0.15549	0.0499519	0.0978295
R4653	hnRNPA2B1	NM_002137, NM_031243, NP_002128, NP_112533	3181	-0.156229	0.0434903	0.0876666
E0143	Episialin	NM_001018016, NM_001018017, NM_001044390, NM_001044391, NM_001044392, NM_001044393, NM_001204285, NM_001204286, NM_001204287, NM_001204288, NM_001204289, NM_001204290, NM_001204291, NM_001204292, NM_001204293, NM_001204294, NM_001204295, NM_001204296, NM_001204297, NM_002456, NP_001018016, NP_001018017, NP_001037855, NP_001037856, NP_001037857, NP_001037858, NP_001191214, NP_001191215, NP_0011912…	4582	-0.157014	0.0518387	0.0988725
H9912	hSNF5 INI1			-0.157393	0.0416199	0.0844289
P2859	p300 CBP			-0.159422	0.0324552	0.0735421
I3659	ING1	NM_005537, NM_198217, NM_198218, NM_198219, NP_005528, NP_937860, NP_937861, NP_937862	3621	-0.161015	0.0405824	0.0831185
H7161	HAT1	NM_003642, NP_003633, NR_027862	8520	-0.161969	0.0239091	0.0639243
A5844	cAbl	NM_005157, NM_007313, NP_005148, NP_009297	25	-0.164075	0.0363057	0.0789094
C4856	CASK LIN2	NM_001126054, NM_001126055, NM_003688, NP_001119526, NP_001119527, NP_003679	8573	-0.164842	0.0253253	0.0665963
G0290	GATA1	NM_002049, NP_002040	2623	-0.166189	0.0374364	0.0802746
E0771	Endothelin			-0.168774	0.0357008	0.0783944
K3638	KIF17			-0.172679	0.0331024	0.0740727
C1926	Collagen Type IV	NM_000495, NM_033380, NP_000486, NP_203699	1287	-0.174321	0.0372441	0.0801312
P6495	PRMT6	NM_018137, NP_060607	55170	-0.175867	0.0213931	0.059957
P0713	Protein Kinase†C			-0.186138	0.0145495	0.0502546
G6916	GADD153			-0.191112	0.0177791	0.0539861
P8359	SerineThreonine Protein Phosphatase 2 A/			-0.19243	0.0394435	0.0817255
F0791	Fibronectin	NM_002026, NM_054034, NM_212474, NM_212476, NM_212478, NM_212482, NP_002017, NP_473375, NP_997639, NP_997641, NP_997643, NP_997647	2335	-0.192492	0.0451045	0.0895086
F2178	FKHRL1 FOXO3a	NM_001455, NM_201559, NP_001446, NP_963853	2309	-0.195257	0.0510209	0.0985069
R5145	Rsk1			-0.195544	0.0311508	0.072081
C2931	Pan Cytokeratin			-0.196809	0.0517063	0.0988725
V7881	Vitronectin	NM_000638, NP_000629	7448	-0.197114	0.020199	0.0578796
C6219	Connexin 43			-0.199275	0.0210678	0.0593054
A0224	Afadin	NM_001040000, NP_001035089	4301	-0.200876	0.0115856	0.045667
F1888	Filamin			-0.20198	0.016458	0.0525564
S9067	Syntaxin 6			-0.206747	0.0369575	0.0797833
M5818	hMps1	NM_001166691, NM_003318, NP_001160163, NP_003309	7272	-0.208888	0.0154904	0.0505216
J2253	cJun pSer73	NM_002228, NP_002219	3725	-0.210045	0.0269885	0.0678367
A7833	ATF1	NM_005171, NP_005162	466	-0.210059	0.0439912	0.0881203
P5746	gParvin	NM_001137605, NM_001137606, NM_022141, NP_001131077, NP_001131078, NP_071424, NR_024426, NR_024427, NR_024428	64098	-0.21205	0.0126534	0.0473194
P8458	Protein Kinase†Ce			-0.212231	0.00998963	0.0452722
T6074	aTubulin			-0.213889	0.0178264	0.0539861
H9411	HDAC4			-0.214274	0.0115626	0.045667
M3567	Myosin Ib Nuclear			-0.21496	0.0143077	0.0501227
G6666	GAP1IP4BP	NM_007368, NP_031394	22821	-0.21574	0.0226482	0.0618469
G1044	GRANZYME B	NM_004131, NP_004122	3002	-0.219551	0.00811803	0.0399032
C5367	Casein Kinase 2a	NM_001895, NM_177559, NM_177560, NP_001886, NP_808227, NP_808228	1457	-0.220314	0.0311947	0.072081
T2949	mTOR			-0.220421	0.0157337	0.0505216
H5147	HSP70			-0.221482	0.0386728	0.0807578
N2661	NAK	NM_013254, NP_037386	29110	-0.221722	0.0166141	0.0525564
T1948	TRF1	NM_003218, NM_017489, NP_003209, NP_059523	7013	-0.223373	0.00916588	0.0422723
C8218	Cdk4			-0.225017	0.0127576	0.0473194
M7818	MTA2 MTA1L			-0.227669	0.0102478	0.045667
D7438	DP2	NM_001178138, NM_001178139, NM_001178140, NM_001178141, NM_001178142, NM_006286, NP_001171609, NP_001171610, NP_001171611, NP_001171612, NP_001171613, NP_006277	7029	-0.230756	0.0116958	0.045667
C1860	Clathrin Heavy Chain			-0.232497	0.0436507	0.0877131
S4047	S6 Kinase	NM_003161, NP_003152	6198	-0.233402	0.0316239	0.0721702
P5117	Peripherin			-0.234847	0.00794137	0.0396448
N3908	Nerve growth factor receptor p75			-0.235567	0.00634447	0.0396025
M5670	MAP Kinase Erk1Erk2			-0.236948	0.0118041	0.045667
D1286	Desmosomal Protein	NM_001941, NM_024423, NP_001932, NP_077741	1825	-0.237418	0.0263832	0.0672468
C8351	Caspase10	NM_001230, NM_032974, NM_032977, NP_001221, NP_116756, NP_116759	843	-0.238129	0.00823329	0.0399999
P4995	PRMT4			-0.238642	0.00615265	0.0396025
P5242	Phospholipase A2 group v	NM_000929, NP_000920	5322	-0.239275	0.0102016	0.045667
M5795	MAP Kinase Kinase MEK MAPKK			-0.241191	0.0146861	0.0503535
S7320	Spred2	NM_001128210, NM_181784, NP_001121682, NP_861449	200734	-0.242563	0.0168066	0.0528302
R8903	hnRNP KJ	NM_002140, NM_031262, NM_031263, NP_002131, NP_112552, NP_112553	3190	-0.24308	0.0302371	0.072081
S9568	SKM1			-0.244209	0.018184	0.0545521
A5463	Acetylated Protein			-0.24589	0.0223439	0.0612982
P0110	Prion protein			-0.246852	0.0141168	0.0498377
C0979	Catalase	NM_001752, NP_001743	847	-0.247002	0.0156715	0.0505216
T7076	Thimet Oligopeptidase 1	NM_003249, NP_003240	7064	-0.248183	0.0281306	0.0696723
A8228	hABH2	NM_001001655, NM_001145374, NM_001145375, NP_001001655, NP_001138846, NP_001138847, NR_026930, NR_026931	121642	-0.249369	0.0113914	0.045667
B0559	BAD			-0.249912	0.00774813	0.0396025
C6417	Cytokeratin peptide 7	NM_005556, NP_005547	3855	-0.252948	0.013312	0.0483317
A2105	AP Endonuclease			-0.253201	0.0223513	0.0612982
J3020	JAB1			-0.254204	0.00486933	0.0396025
P1484	p21WAF1Cip1			-0.254805	0.00482365	0.0396025
F2051	Fas Ligand	NM_000639, NP_000630	356	-0.255944	0.0132837	0.0483317
C7339	Cyclin D2	NM_001759, NP_001750	894	-0.257007	0.011605	0.045667
P8982	p53 pSer392			-0.257855	0.0117255	0.045667
C7724	Caspase 7	NM_001227, NM_033338, NM_033339, NM_033340, NP_001218, NP_203124, NP_203125, NP_203126	840	-0.258137	0.00632461	0.0396025
S9809	Sp1	NM_003109, NM_138473, NP_003100, NP_612482	6667	-0.259059	0.00461543	0.0396025
S2944	SMN	NM_017411, NM_022875, NM_022876, NM_022877, NP_059107, NP_075013, NP_075014, NP_075015	6607	-0.259187	0.00776707	0.0396025
C1229	Caspase 10	NM_001230, NM_032974, NM_032977, NP_001221, NP_116756, NP_116759	843	-0.259658	0.030433	0.072081
L1538	LIN7	NM_004664, NP_004655	8825	-0.263477	0.00500756	0.0396025
A7674	AOP1			-0.267267	0.0500749	0.0978295
M2445	MSH6	NM_000179, NP_000170	2956	-0.268854	0.0264396	0.0672468
P7607	Protein Phosphatase 1a			-0.270233	0.00828994	0.0399999
H9537	HMG1	NM_002128, NP_002119	3146	-0.270991	0.00534703	0.0396025
H1775	HSP 90	NM_001017963, NM_005348, NP_001017963, NP_005339	3320	-0.271624	0.00398614	0.0396025
I9783	Importin a3	NM_002268, NP_002259	3840	-0.273016	0.0236322	0.0635762
N3038	Nanog	NM_024865, NP_079141	79923	-0.273093	0.0107657	0.045667
P4334	Protein Kinase†Ca			-0.276797	0.00383038	0.0396025
C6118	CDK5			-0.277716	0.0131015	0.048114
P7605	PARP	NM_001618, NP_001609	142	-0.277883	0.00502748	0.0396025
C6613	Cdc7 Kinase	NM_001134419, NM_001134420, NM_003503, NP_001127891, NP_001127892, NP_003494	8317	-0.278664	0.027071	0.0678367
P7493	PCAF	NM_003884, NP_003875	8850	-0.281983	0.00418719	0.0396025
I0282	aInternexin	NM_032727, NP_116116	9118	-0.283327	0.00530102	0.0396025
C8343	Cdk6			-0.284142	0.00905007	0.0422116
J4500	cJun N Terminal Kinase	NM_002750, NM_139046, NM_139047, NM_139049, NP_002741, NP_620634, NP_620635, NP_620637	5599	-0.285566	0.00453118	0.0396025
B1310	BACH1			-0.286367	0.0313476	0.072081
M0691	Myosin VI			-0.28678	0.0033768	0.0396025
E8776	E2F2	NM_004091, NP_004082	1870	-0.287602	0.00296103	0.0396025
J2128	cJun pSer63	NM_002228, NP_002219	3725	-0.287963	0.00579965	0.0396025
N3662	Neurofibromin	NM_000268, NM_016418, NM_181825, NM_181828, NM_181829, NM_181830, NM_181831, NM_181832, NM_181833, NP_000259, NP_057502, NP_861546, NP_861966, NP_861967, NP_861968, NP_861969, NP_861970, NP_861971	4771	-0.288448	0.00751675	0.0396025
T8578	Beta tubulin III (neuronal)	NM_001197181, NM_006086, NP_001184110, NP_006077	10381	-0.290261	0.0395199	0.0817255
M4812	Myosin Va			-0.293842	0.00507725	0.0396025
T7941	bTubulin IV	NM_006087, NP_006078	10382	-0.293905	0.00242555	0.0396025
A8103	hABH1	NM_006020, NP_006011	8846	-0.300534	0.00602936	0.0396025
C5867	Ciliated Cell Marker			-0.302277	0.00583844	0.0396025
E8767	cerbB3	NM_001005915, NM_001982, NP_001005915, NP_001973	2065	-0.302386	0.0265199	0.0672468
B0561	BUB1	NM_004336, NP_004327	699	-0.304173	0.0153038	0.0505216
R5404	Rab9			-0.304621	0.0380972	0.0806163
M9942	MAP2			-0.308602	0.0028196	0.0396025
P7679	Platelet-Derived Growth Factor Receptor	NM_002609, NP_002600	5159	-0.309594	0.0298808	0.0720522
C7214	Cyclin D3			-0.310286	0.0304377	0.072081
C7055	Calmodulin			-0.311634	0.0118634	0.045667
N9287	NBS1 Nibrin	NM_002485, NP_002476	4683	-0.313687	0.0174883	0.053469
C7736	Centrin	NM_004066, NP_004057	1068	-0.315644	0.00469546	0.0396025
A0349	IAfadin	NM_001040000, NP_001035089	4301	-0.317672	0.00561735	0.0396025
P1093	Paxillin	NM_001080855, NM_002859, NM_025157, NP_001074324, NP_002850, NP_079433	5829	-0.318316	0.00710612	0.0396025
A8353	hABH3			-0.318552	0.00330014	0.0396025
B9303	BAP1	NM_004656, NP_004647	8314	-0.320372	0.00712113	0.0396025
C7354	CalbindinD28K	NM_004929, NP_004920	793	-0.320607	0.0148145	0.0503535
P2860	PSF			-0.323242	0.00760757	0.0396025
P9370	PRMT3	NM_001145166, NM_001145167, NM_005788, NP_001138638, NP_001138639, NP_005779	10196	-0.323915	0.014067	0.0498377
C7479	Calretinin			-0.324724	0.00645319	0.0396025
F5303	Falkor PHD1			-0.328667	0.0107596	0.045667
C8093	Connexin43			-0.329495	0.0156533	0.0505216
I6139	IKKa	NM_001278, NP_001269	1147	-0.332094	0.00336129	0.0396025
F4424	Fas CD95 Apo1	NM_000043, NM_152871, NM_152872, NP_000034, NP_690610, NP_690611, NR_028033, NR_028034, NR_028035, NR_028036	355	-0.333007	0.0204588	0.0583092
T0825	Transportin 1			-0.334935	0.00196271	0.0396025
C9479	Cdc25A	NM_001789, NM_201567, NP_001780, NP_963861	993	-0.336758	0.0280704	0.0696723
B0806	BACE 1	NM_012104, NM_138971, NM_138972, NM_138973, NP_036236, NP_620427, NP_620428, NP_620429	23621	-0.338679	0.0072217	0.0396025
U0508	Ubiquitin			-0.339285	0.00393342	0.0396025
E9653	Endothelial Cells			-0.345476	0.00291079	0.0396025
R4903	hnRNPL	NM_001005335, NM_001533, NP_001005335, NP_001524	3191	-0.345931	0.00607727	0.0396025
D8940	Destrin ADF			-0.348062	0.00355571	0.0396025
N5139	Neurofilament 68	NM_006158, NP_006149	4747	-0.350499	0.0105068	0.045667
B9310	BUBR1	NM_001211, NP_001202	701	-0.351262	0.00783408	0.0396025
C2081	aCatenin			-0.356539	0.00350353	0.0396025
E6280	Endothelial Cell Protein C Receptor	NM_006404, NP_006395	10544	-0.358234	0.00673824	0.0396025
C5176	Cytokeratin peptide4	NM_002272, NP_002263	3851	-0.360992	0.00307758	0.0396025
C7099	CaM Kinase Kinase a CaMKKa			-0.362424	0.00587639	0.0396025
I1659	IFI16	NM_005531, NP_005522	3428	-0.36334	0.0084624	0.0403543
C3095	Cystatin A	NM_005213, NP_005204	1475	-0.363527	0.032793	0.0738433
V4762	Vascular Endothelial Growth Factor Recep	NM_001159920, NM_001160030, NM_001160031, NM_002019, NP_001153392, NP_001153502, NP_001153503, NP_002010	2321	-0.371873	0.00117353	0.0396025
M9192	MRP1	NM_004996, NM_019862, NM_019898, NM_019899, NM_019900, NP_004987, NP_063915, NP_063953, NP_063954, NP_063955	4363	-0.373206	0.00159163	0.0396025
P5704	Protein Kinase C PKC			-0.373596	0.0507028	0.0984774
C1862	Coilin	NM_004645, NP_004636	8161	-0.374425	0.0286178	0.0702846
C1354	Caspase11			-0.374749	0.00139522	0.0396025
T2780	Tropomyosin	NM_000366, NM_001018004, NM_001018005, NM_001018006, NM_001018007, NM_001018008, NM_001018020, NP_000357, NP_001018004, NP_001018005, NP_001018006, NP_001018007, NP_001018008, NP_001018020	7168	-0.376984	0.00182298	0.0396025
P6834	Proliferating Cell Protein Ki67	NM_001145966, NM_002417, NP_001139438, NP_002408	4288	-0.383235	0.00117653	0.0396025
R5028	hnRNPC1C2	NM_001077442, NM_001077443, NM_004500, NM_031314, NP_001070910, NP_001070911, NP_004491, NP_112604	3183	-0.389923	0.0074317	0.0396025
P0084	Pinin	NM_002687, NP_002678	5411	-0.397155	0.00106582	0.0396025
R4528	hnRNPA1	NM_002136, NM_031157, NP_002127, NP_112420	3178	-0.399576	0.00208111	0.0396025
R8529	RALAR	NM_005402, NP_005393	5898	-0.399646	0.0127057	0.0473194
E8655	E6AP	NM_198256, NP_937987, NR_003092, NR_003093, NR_003094, NR_003095	1876	-0.402376	0.0315648	0.0721702
C8035	Chondroitin Sulfate			-0.40361	0.0168965	0.0528302
H9163	HDRP MITR			-0.405858	0.000700659	0.0396025
R6278	hnRNPU	NM_004501, NM_031844, NP_004492, NP_114032	3192	-0.40979	0.00605644	0.0396025
M7569	MTA 2			-0.415681	0.00243167	0.0396025
G7914	Glycogen Synthase Kinase3b			-0.416593	0.00145072	0.0396025
M3692	MRP2	NM_000392, NP_000383	1244	-0.417169	0.00656157	0.0396025
V4505	Vinculin			-0.42322	0.00559516	0.0396025
R8779	Rab7			-0.425824	0.00104298	0.0396025
P0104	PIASy	NM_015897, NP_056981	51588	-0.426721	0.000742683	0.0396025
R8274	RIP Receptor Interacting Protein	NM_003804, NP_003795	8737	-0.433045	0.00484402	0.0396025
M8694	Mad2	NM_002358, NP_002349	4085	-0.438675	0.00763819	0.0396025
E8526	E2F4	NM_001950, NP_001941	1874	-0.440938	0.000436793	0.0396025
G6670	Growth Factor Independence1			-0.443107	0.0115894	0.045667
A5044	aActinin	NM_001102, NM_001130004, NM_001130005, NP_001093, NP_001123476, NP_001123477	87	-0.449579	0.00179576	0.0396025
S1190	SLIPR MAGI3			-0.453118	0.00490116	0.0396025
P7484	Serine Threonine Protein Phosphatase 1b	NM_002709, NM_206876, NP_002700, NP_996759	5500	-0.455171	0.0263495	0.0672468
T2928	Tyrosin hydroxylase			-0.459848	0.00576774	0.0396025
M7905	Myosin Light Chain Kinase	NM_053025, NM_053026, NM_053027, NM_053028, NM_053031, NM_053032, NP_444253, NP_444254, NP_444255, NP_444256, NP_444259, NP_444260	4638	-0.465329	0.00199917	0.0396025
C2238	Cdc14A	NM_003672, NM_033312, NM_033313, NP_003663, NP_201569, NP_201570	8556	-0.46928	0.00762833	0.0396025
C4710	Cyclin A			-0.481444	0.0334701	0.0745205
A0844	AP2a	NM_001032280, NM_001042425, NM_003220, NP_001027451, NP_001035890, NP_003211	7020	-0.494369	0.00214931	0.0396025
M1320	MTA1			-0.496959	0.0153152	0.0505216
S3934	Smad4	NM_005359, NP_005350	4089	-0.49933	0.00108341	0.0396025
T8573	TopoisomeraseI	NM_003286, NP_003277	7150	-0.512407	0.00071606	0.0396025
M6783	MAP1 Light Chain			-0.523864	0.0156335	0.0505216
C6542	Caldesmon	NM_004342, NM_033138, NM_033139, NM_033140, NM_033157, NP_004333, NP_149129, NP_149130, NP_149131, NP_149347	800	-0.536282	0.00409415	0.0396025
L3044	LRRK2 (PARK8)	NM_198578, NP_940980	120892	-0.539804	0.000468442	0.0396025
P8109	Serine Threonine Protein Phosphatase 2 A	NM_002715, NP_002706	5515	-0.54745	0.000566109	0.0396025
L7391	LIS1			-0.551113	0.00544332	0.0396025
E8651	E2F3	NM_001949, NP_001940	1871	-0.5669	0.00107528	0.0396025
C7034	Cytokeratin 8 12	NM_002275, NP_002266	3866	-0.626993	0.0192093	0.056049
E4531	ELKS			-0.644102	0.0195178	0.0566903
P7609	Serine Threonine Protein Phosphatase 1g1			-0.660872	0.000274028	0.0396025
A5968	AP1	NM_002228, NP_002219	3725	-0.689101	0.00542278	0.0396025
P8825	Proliferating Cell Nuclear Antigen	NM_002592, NM_182649, NP_002583, NP_872590	5111	-0.862861	0.0379411	0.0806163
D3813	DR4	NM_003844, NP_003835	8797	-1.01495	0.0206226	0.0583092
