# Supplementary material for: A Systems Biology Approach to Characterize the Regulatory Networks Leading to Trabectedin Resistance in an In Vitro Model of Myxoid Liposarcoma
Source: PLoS One. 2012 Apr 16;7(4):e35423. doi: 10.1371/journal.pone.0035423 (PMC3327679; doi:10.1371/journal.pone.0035423)
Supplement: Table S6 — Simple interactions format (sif) file for gene-gene and miRNA-gene interactions of the whole network reported in Figure S1. (XLSX) [file pone.0035423.s007.xlsx]

## Sheet: Sheet1
hsa-miR-29b-1*	NM_182487
hsa-miR-20a	NM_001553
hsa-miR-199b-5p	NM_001553
hsa-miR-16-2*	NM_001553
hsa-miR-29b-1*	NM_022804
hsa-miR-16-2*	NM_022804
hsa-miR-96	NM_080647
hsa-miR-96	NM_015570
hsa-miR-7	NM_015570
hsa-miR-425	NM_015570
hsa-miR-320d	NM_015570
hsa-miR-320c	NM_015570
hsa-miR-320b	NM_015570
hsa-miR-320a	NM_015570
hsa-miR-29b	NM_015570
hsa-miR-19b	NM_015570
hsa-miR-19a	NM_015570
hsa-miR-199b-5p	NM_015570
hsa-miR-192	NM_015570
hsa-miR-183	NM_015570
hsa-miR-181b	NM_015570
hsa-miR-17*	NM_015570
hsa-miR-320d	NM_024089
hsa-miR-320c	NM_024089
hsa-miR-320b	NM_024089
hsa-miR-320a	NM_024089
hsa-miR-29c	NM_024089
hsa-miR-29b-1*	NM_024089
hsa-miR-29b	NM_024089
hsa-miR-196a	NM_024089
hsa-miR-98	NM_033512
hsa-miR-324-5p	NM_033512
hsa-miR-30d	NM_033512
hsa-miR-29c	NM_033512
hsa-miR-29b-1*	NM_033512
hsa-miR-29b	NM_033512
hsa-miR-19b	NM_033512
hsa-miR-19a	NM_033512
hsa-miR-183	NM_033512
hsa-miR-17*	NM_033512
hsa-miR-16-2*	NM_033512
hsa-let-7e	NM_033512
hsa-let-7c	NM_033512
hsa-miR-7	NR_002766
hsa-miR-1915	NR_002766
hsa-miR-125a-5p	NR_002766
hsa-let-7e	NR_002766
hsa-miR-24	NM_004750
hsa-miR-542-3p	NM_003012
hsa-miR-425	NM_003012
hsa-miR-331-3p	NM_003012
hsa-miR-29b	NM_003012
hsa-miR-96	NM_152421
hsa-miR-7	NM_152421
hsa-miR-320d	NM_152421
hsa-miR-320c	NM_152421
hsa-miR-320b	NM_152421
hsa-miR-320a	NM_152421
hsa-miR-29b-1*	NM_152421
hsa-miR-181b	NM_152421
hsa-let-7e	NM_152421
hsa-miR-96	AK025855
hsa-miR-320d	AK025855
hsa-miR-320c	AK025855
hsa-miR-320b	AK025855
hsa-miR-320a	AK025855
hsa-miR-98	NM_012105
hsa-miR-196a	NM_012105
hsa-miR-181b	NM_012105
hsa-let-7e	NM_012105
hsa-let-7c	NM_012105
hsa-miR-7	NM_022463
hsa-miR-29b-1*	NM_022463
hsa-miR-1915	NM_022463
hsa-miR-542-3p	NM_172387
hsa-miR-19b	NM_172387
hsa-miR-19a	NM_172387
hsa-miR-16-2*	NM_172387
hsa-miR-125a-5p	NM_172387
hsa-miR-663	NM_004444
hsa-miR-542-3p	NM_004444
hsa-miR-331-3p	NM_004444
hsa-miR-20a	NM_004444
hsa-miR-15a	NM_004444
hsa-miR-130a	NM_004444
hsa-miR-320d	NM_000820
hsa-miR-320c	NM_000820
hsa-miR-320b	NM_000820
hsa-miR-320a	NM_000820
hsa-miR-16-2*	NM_000820
hsa-miR-92a	NM_000076
hsa-miR-320d	NM_000076
hsa-miR-320c	NM_000076
hsa-miR-320b	NM_000076
hsa-miR-320a	NM_000076
hsa-miR-30d	NM_000076
hsa-miR-29b-1*	NM_000076
hsa-miR-24	NM_000076
hsa-miR-19b	NM_000076
hsa-miR-199b-5p	NM_000076
hsa-miR-183	NM_002775
hsa-miR-29b-1*	NM_025245
hsa-miR-15a	NM_001252
hsa-miR-320d	NM_174953
hsa-miR-320c	NM_174953
hsa-miR-320b	NM_174953
hsa-miR-320a	NM_174953
hsa-miR-331-3p	NM_003260
hsa-miR-125a-5p	NM_024718
hsa-miR-29c	NM_014213
hsa-miR-29b	NM_014213
hsa-miR-125a-5p	NM_014213
hsa-miR-324-5p	NM_022003
hsa-miR-20a	NM_022003
hsa-let-7e	NM_022003
hsa-miR-96	AL832758
hsa-miR-29b	AL832758
hsa-miR-96	NM_001190
hsa-miR-92a	NM_001190
hsa-miR-15a	NM_001190
hsa-miR-98	NM_015892
hsa-miR-331-3p	NM_015892
hsa-miR-22	NM_015892
hsa-miR-146a	NM_015892
hsa-miR-130a	NM_015892
hsa-let-7e	NM_015892
hsa-let-7c	NM_015892
hsa-miR-7	NM_032333
hsa-miR-21	NM_032333
hsa-miR-20a	NM_032333
hsa-miR-1915	NM_032333
hsa-miR-125a-5p	NM_032333
hsa-let-7e	NM_032333
hsa-let-7c	NM_032333
hsa-miR-98	NM_004155
hsa-miR-29c	NM_004155
hsa-miR-29b	NM_004155
hsa-miR-181b	NM_004155
hsa-miR-15a	NM_004155
hsa-let-7e	NM_004155
hsa-let-7c	NM_004155
hsa-miR-20a	NM_001794
hsa-miR-324-3p	NM_005229
hsa-miR-1915	NM_005229
hsa-miR-125a-5p	NM_005229
hsa-miR-324-3p	NM_053042
hsa-miR-30d	NM_053042
hsa-miR-29c	NM_053042
hsa-miR-29b	NM_053042
hsa-miR-19b	NM_053042
hsa-miR-19a	NM_053042
hsa-miR-17*	NM_053042
hsa-miR-15a	NM_053042
hsa-miR-125a-5p	NM_053042
hsa-miR-96	NM_152262
hsa-miR-425	NM_152262
hsa-miR-30d	NM_152262
hsa-miR-199b-5p	NM_152262
hsa-miR-181b	NM_152262
hsa-miR-30d	NM_024757
hsa-miR-20a	NM_024757
hsa-miR-663	NM_052847
hsa-miR-331-3p	NM_052847
hsa-miR-196a	NM_052847
hsa-miR-96	NM_031461
hsa-miR-92a	NM_031461
hsa-miR-7	NM_031461
hsa-miR-30d	NM_031461
hsa-miR-29c	NM_031461
hsa-miR-29b-1*	NM_031461
hsa-miR-29b	NM_031461
hsa-miR-20a	NM_031461
hsa-miR-192	NM_031461
hsa-miR-183	NM_031461
hsa-miR-181b	NM_031461
hsa-miR-16-2*	NM_031461
hsa-miR-130a	NM_031461
hsa-miR-542-3p	NM_002073
hsa-miR-331-3p	NM_002073
hsa-miR-324-3p	NM_002073
hsa-miR-320d	NM_002073
hsa-miR-320c	NM_002073
hsa-miR-320b	NM_002073
hsa-miR-320a	NM_002073
hsa-miR-181b	NM_014867
hsa-miR-16-2*	NM_014867
hsa-miR-10b	NM_014867
hsa-miR-10a	NM_014867
hsa-miR-29b-1*	NM_017951
hsa-miR-24	NM_017951
hsa-miR-130a	NM_017951
hsa-miR-21	NM_002020
hsa-miR-199b-5p	NM_002020
hsa-miR-192	NM_002020
hsa-miR-16-2*	NM_178537
hsa-miR-146a	NM_178537
hsa-miR-320d	NM_015278
hsa-miR-320c	NM_015278
hsa-miR-320b	NM_015278
hsa-miR-320a	NM_015278
hsa-miR-21	NM_015278
hsa-miR-20a	NM_015278
hsa-miR-199b-5p	NM_015278
hsa-miR-183	NM_015278
hsa-miR-17*	NM_015278
hsa-miR-16-2*	NM_015278
hsa-miR-130a	NM_015278
hsa-miR-96	NM_002998
hsa-miR-92a	NM_002998
hsa-miR-542-3p	NM_002998
hsa-miR-425	NM_002998
hsa-miR-331-3p	NM_002998
hsa-miR-324-3p	NM_002998
hsa-miR-31*	NM_002998
hsa-miR-30d	NM_002998
hsa-miR-20a	NM_002998
hsa-miR-19b	NM_002998
hsa-miR-19a	NM_002998
hsa-miR-183	NM_002998
hsa-miR-181b	NM_002998
hsa-miR-17*	NM_002998
hsa-miR-16-2*	NM_002998
hsa-miR-126	NM_002998
hsa-miR-7	NM_007257
hsa-miR-425	NM_007257
hsa-miR-320d	NM_007257
hsa-miR-320c	NM_007257
hsa-miR-320b	NM_007257
hsa-miR-320a	NM_007257
hsa-miR-29c	NM_007257
hsa-miR-29b	NM_007257
hsa-miR-183	NM_007257
hsa-miR-181b	NM_007257
hsa-miR-146a	NM_007257
hsa-miR-331-3p	NM_002143
hsa-miR-365	NM_016134
hsa-miR-20a	NM_016134
hsa-miR-331-3p	NM_005515
hsa-miR-181b	NM_005515
hsa-miR-16-2*	NM_005515
hsa-miR-146a	NM_005515
hsa-miR-96	NM_138370
hsa-miR-92a	NM_138370
hsa-miR-7	NM_138370
hsa-miR-324-5p	NM_138370
hsa-miR-324-3p	NM_138370
hsa-miR-30d	NM_138370
hsa-miR-29b-1*	NM_138370
hsa-miR-1915	NM_138370
hsa-miR-98	NM_003918
hsa-miR-22	NM_003918
hsa-miR-196a	NM_003918
hsa-miR-192	NM_003918
hsa-miR-146a	NM_003918
hsa-let-7e	NM_003918
hsa-let-7c	NM_003918
hsa-miR-98	NM_002515
hsa-miR-96	NM_002515
hsa-miR-92a	NM_002515
hsa-miR-542-3p	NM_002515
hsa-miR-30d	NM_002515
hsa-miR-22	NM_002515
hsa-miR-21	NM_002515
hsa-miR-20a	NM_002515
hsa-miR-19b	NM_002515
hsa-miR-19a	NM_002515
hsa-miR-199b-5p	NM_002515
hsa-miR-196a	NM_002515
hsa-miR-193a-3p	NM_002515
hsa-miR-192	NM_002515
hsa-miR-183	NM_002515
hsa-miR-181b	NM_002515
hsa-miR-16-2*	NM_002515
hsa-miR-146a	NM_002515
hsa-miR-130a	NM_002515
hsa-let-7e	NM_002515
hsa-let-7c	NM_002515
hsa-miR-192	NM_014045
hsa-miR-15a	NM_014045
hsa-miR-146a	NM_014045
hsa-miR-181b	NM_173575
hsa-miR-98	NM_014431
hsa-miR-425	NM_014431
hsa-miR-22	NM_014431
hsa-miR-199b-5p	NM_014431
hsa-miR-196a	NM_014431
hsa-miR-16-2*	NM_014431
hsa-let-7e	NM_014431
hsa-let-7c	NM_014431
hsa-miR-324-3p	NM_015503
hsa-miR-96	NM_005715
hsa-miR-92a	NM_005715
hsa-miR-324-3p	NM_005715
hsa-miR-320d	NM_005715
hsa-miR-320c	NM_005715
hsa-miR-320b	NM_005715
hsa-miR-320a	NM_005715
hsa-miR-29b-1*	NM_005715
hsa-miR-24	NM_005715
hsa-miR-20a	NM_005715
hsa-miR-19b	NM_005715
hsa-miR-19a	NM_005715
hsa-miR-1915	NM_005715
hsa-miR-146a	NM_005715
hsa-miR-20a	NM_001299
hsa-miR-199b-5p	NM_001299
hsa-miR-10b	NM_001299
hsa-miR-10a	NM_001299
hsa-miR-29c	NM_182908
hsa-miR-29b	NM_182908
hsa-miR-20a	NM_021219
hsa-miR-7	NM_007121
hsa-miR-98	NM_003811
hsa-miR-30d	NM_003811
hsa-let-7e	NM_003811
hsa-let-7c	NM_003811
hsa-miR-30d	NM_198317
hsa-miR-19b	NM_198317
hsa-miR-19a	NM_198317
hsa-miR-183	NM_198317
hsa-miR-24	NM_004107
hsa-miR-199b-5p	NM_004107
hsa-miR-7	NM_003119
hsa-miR-542-3p	NM_003119
hsa-miR-146a	NM_003119
hsa-miR-542-3p	NM_006412
hsa-miR-542-3p	NM_000071
hsa-miR-30d	NM_000071
hsa-miR-24	NM_000071
hsa-miR-210	NM_000071
hsa-miR-16-2*	NM_000071
hsa-miR-92a	NM_017617
hsa-miR-425	NM_017617
hsa-miR-30d	NM_017617
hsa-miR-19b	NM_017617
hsa-miR-19a	NM_017617
hsa-miR-199b-5p	NM_017617
hsa-miR-183	NM_017617
hsa-miR-130a	NM_017617
hsa-miR-92a	NM_203403
hsa-miR-29b-1*	NM_203403
hsa-miR-210	NM_203403
hsa-miR-21	NM_203403
hsa-miR-15a	NM_203403
hsa-miR-125a-5p	NM_203403
hsa-miR-663	NM_006045
hsa-miR-320d	NM_006045
hsa-miR-320c	NM_006045
hsa-miR-320b	NM_006045
hsa-miR-320a	NM_006045
hsa-miR-17*	NM_006045
hsa-miR-324-3p	NM_007126
hsa-miR-29b-1*	NM_007126
hsa-miR-1915	NM_007126
hsa-miR-183	NM_007126
hsa-miR-181b	NM_007126
hsa-miR-130a	NM_007126
hsa-miR-324-3p	NM_005335
hsa-miR-30d	NM_005335
hsa-miR-425	NM_015677
hsa-miR-320d	NM_015677
hsa-miR-320c	NM_015677
hsa-miR-320b	NM_015677
hsa-miR-320a	NM_015677
hsa-miR-30d	NM_015677
hsa-miR-16-2*	NM_015677
hsa-miR-146a	NM_015677
hsa-miR-96	NM_014604
hsa-miR-22	NM_014604
hsa-miR-92a	NM_001406
hsa-miR-29c	NM_001406
hsa-miR-29b-1*	NM_001406
hsa-miR-29b	NM_001406
hsa-let-7e	NM_001406
hsa-let-7c	NM_001406
hsa-miR-24	NM_004789
hsa-miR-96	NM_004414
hsa-miR-425	NM_004414
hsa-miR-324-5p	NM_004414
hsa-miR-30d	NM_004414
hsa-miR-181b	NM_004414
hsa-miR-17*	NM_004414
hsa-miR-16-2*	NM_004414
hsa-miR-125a-5p	NM_004414
hsa-miR-181b	NM_032510
hsa-miR-146a	NM_032510
hsa-miR-22	NM_003801
hsa-miR-96	NM_206808
hsa-miR-96	NM_014292
hsa-miR-425	NM_014292
hsa-miR-92a	NM_001029885
hsa-miR-7	NM_001029885
hsa-miR-7	NM_025057
hsa-miR-542-3p	NM_025057
hsa-miR-425	NM_025057
hsa-miR-320d	NM_025057
hsa-miR-320c	NM_025057
hsa-miR-320b	NM_025057
hsa-miR-320a	NM_025057
hsa-miR-192	NM_025057
hsa-miR-24	NM_024297
hsa-miR-22	NM_024297
hsa-miR-146a	NM_024297
hsa-miR-130a	NM_024297
hsa-miR-125a-5p	NM_024297
hsa-miR-96	NM_175061
hsa-miR-320d	NM_175061
hsa-miR-320c	NM_175061
hsa-miR-320b	NM_175061
hsa-miR-320a	NM_175061
hsa-miR-30d	NM_175061
hsa-miR-29c	NM_175061
hsa-miR-29b-1*	NM_175061
hsa-miR-29b	NM_175061
hsa-miR-20a	NM_175061
hsa-miR-19b	NM_175061
hsa-miR-19a	NM_175061
hsa-miR-199b-5p	NM_175061
hsa-miR-193a-3p	NM_175061
hsa-miR-181b	NM_175061
hsa-miR-17*	NM_175061
hsa-miR-16-2*	NM_175061
hsa-miR-15a	NM_175061
hsa-miR-146a	NM_175061
hsa-miR-19b	NM_133489
hsa-miR-19a	NM_133489
hsa-miR-181b	NM_133489
hsa-miR-30d	NM_206855
hsa-miR-29c	NM_206855
hsa-miR-29b	NM_206855
hsa-miR-20a	NM_206855
hsa-miR-19b	NM_206855
hsa-miR-19a	NM_206855
hsa-miR-196a	NM_206855
hsa-miR-181b	NM_206855
hsa-miR-17*	NM_206855
hsa-miR-16-2*	NM_206855
hsa-miR-15a	NM_206855
hsa-miR-96	NM_002975
hsa-miR-92a	NM_002975
hsa-miR-324-3p	NM_002975
hsa-miR-30d	NM_016256
hsa-miR-320d	NM_005561
hsa-miR-320c	NM_005561
hsa-miR-320b	NM_005561
hsa-miR-320a	NM_005561
hsa-miR-20a	NM_005561
hsa-miR-96	AB037863
hsa-miR-324-5p	AB037863
hsa-miR-324-3p	AB037863
hsa-miR-320d	AB037863
hsa-miR-320c	AB037863
hsa-miR-320b	AB037863
hsa-miR-320a	AB037863
hsa-miR-29b-1*	AB037863
hsa-miR-125a-5p	AB037863
hsa-miR-542-3p	NM_002746
hsa-miR-24	NM_031444
hsa-miR-193a-3p	NM_031444
hsa-miR-17*	NM_031444
hsa-miR-30d	NM_002402
hsa-miR-29c	NM_002402
hsa-miR-29b-1*	NM_002402
hsa-miR-29b	NM_002402
hsa-miR-181b	NM_002402
hsa-miR-16-2*	NM_002402
hsa-miR-15a	NM_002402
hsa-miR-92a	NM_019558
hsa-miR-24	NM_019558
hsa-miR-20a	NM_019558
hsa-miR-19b	NM_019558
hsa-miR-19a	NM_019558
hsa-miR-196a	NM_019558
hsa-miR-16-2*	NM_019558
hsa-miR-130a	NM_019558
hsa-miR-663	NM_002579
hsa-miR-29c	NM_002579
hsa-miR-29b	NM_002579
hsa-miR-98	NM_012268
hsa-miR-10b	NM_012268
hsa-miR-10a	NM_012268
hsa-let-7e	NM_012268
hsa-let-7c	NM_012268
hsa-miR-29c	NM_018689
hsa-miR-29b	NM_018689
hsa-miR-181b	NM_018689
hsa-miR-146a	NM_018689
hsa-miR-130a	NM_018689
hsa-miR-20a	NM_003791
hsa-miR-324-5p	NM_016831
hsa-miR-320d	NM_016831
hsa-miR-320c	NM_016831
hsa-miR-320b	NM_016831
hsa-miR-320a	NM_016831
hsa-miR-30d	NM_016831
hsa-miR-29c	NM_016831
hsa-miR-29b	NM_016831
hsa-miR-193a-3p	NM_016831
hsa-miR-181b	NM_016831
hsa-miR-98	NM_024681
hsa-miR-324-5p	NM_024681
hsa-miR-1915	NM_024681
hsa-miR-10b	NM_024681
hsa-miR-10a	NM_024681
hsa-let-7e	NM_024681
hsa-let-7c	NM_024681
hsa-miR-663	NM_001520
hsa-miR-29c	NM_001520
hsa-miR-29b	NM_001520
hsa-miR-324-3p	NM_017566
hsa-miR-331-3p	NM_033200
hsa-miR-542-3p	NM_003451
hsa-miR-125a-5p	NM_003451
hsa-miR-20a	NM_005194
hsa-miR-16-2*	NM_005194
hsa-miR-96	NM_002742
hsa-miR-542-3p	NM_002742
hsa-miR-199b-5p	NM_002742
hsa-miR-192	NM_002742
hsa-miR-183	NM_002742
hsa-miR-181b	NM_002742
hsa-miR-16-2*	NM_002742
hsa-miR-130a	NM_002742
hsa-miR-22	NM_194324
hsa-miR-21	NM_194324
hsa-miR-181b	NM_194324
hsa-miR-663	NM_198867
hsa-miR-1915	NM_198867
hsa-miR-320d	NM_032623
hsa-miR-320c	NM_032623
hsa-miR-320b	NM_032623
hsa-miR-320a	NM_032623
hsa-miR-192	NM_032623
hsa-miR-125a-5p	NM_000017
hsa-miR-98	NM_000090
hsa-miR-29c	NM_000090
hsa-miR-29b-1*	NM_000090
hsa-miR-29b	NM_000090
hsa-miR-21	NM_000090
hsa-miR-199b-5p	NM_000090
hsa-miR-196a	NM_000090
hsa-miR-192	NM_000090
hsa-miR-181b	NM_000090
hsa-miR-16-2*	NM_000090
hsa-let-7e	NM_000090
hsa-let-7c	NM_000090
hsa-miR-30d	NM_014732
hsa-miR-20a	NM_014732
hsa-miR-30d	NM_006804
hsa-miR-425	NM_014293
hsa-miR-181b	NM_014293
hsa-miR-146a	NM_001398
hsa-miR-425	NM_002221
hsa-miR-331-3p	NM_002221
hsa-miR-29b	NM_002221
hsa-miR-20a	NM_002221
hsa-miR-146a	NM_002221
hsa-miR-331-3p	NM_004860
hsa-miR-1915	NM_004860
hsa-miR-130a	NM_004860
hsa-miR-10b	NM_004860
hsa-miR-10a	NM_004860
hsa-miR-7	NM_178012
hsa-miR-542-3p	NM_178012
hsa-miR-29c	NM_178012
hsa-miR-29b	NM_178012
hsa-miR-16-2*	NM_178012
hsa-miR-92a	NM_005618
hsa-miR-320d	NM_005618
hsa-miR-320c	NM_005618
hsa-miR-320b	NM_005618
hsa-miR-320a	NM_005618
hsa-miR-24	NM_005618
hsa-miR-20a	NM_005618
hsa-miR-199b-5p	NM_005618
hsa-miR-193a-3p	NM_005618
hsa-miR-181b	NM_005618
hsa-miR-16-2*	NM_005618
hsa-miR-15a	NM_005618
hsa-miR-146a	NM_005618
hsa-miR-130a	NM_005618
hsa-miR-92a	NM_006843
hsa-miR-324-3p	NM_006843
hsa-miR-15a	NM_006843
hsa-miR-96	NM_021158
hsa-miR-30d	NM_021158
hsa-miR-29b-1*	NM_021158
hsa-miR-24	NM_021158
hsa-miR-199b-5p	NM_021158
hsa-miR-192	NM_021158
hsa-miR-331-3p	NM_032377
hsa-miR-365	NM_004734
hsa-miR-29c	NM_004734
hsa-miR-29b	NM_004734
hsa-miR-181b	NM_004734
hsa-miR-17*	NM_004734
hsa-miR-15a	NM_004734
hsa-miR-146a	NM_004734
hsa-miR-125a-5p	NM_004734
hsa-miR-7	NM_052875
hsa-miR-425	NM_052875
hsa-miR-30d	NM_052875
hsa-miR-192	NM_052875
hsa-miR-1915	NM_052875
hsa-miR-146a	NM_052875
hsa-miR-96	NM_031454
hsa-miR-29b-1*	NM_031454
hsa-miR-199b-5p	NM_031454
hsa-miR-320d	NM_032584
hsa-miR-320c	NM_032584
hsa-miR-320b	NM_032584
hsa-miR-320a	NM_032584
hsa-miR-181b	NM_032584
hsa-miR-17*	NM_032584
hsa-miR-542-3p	NM_054033
hsa-miR-425	NM_054033
hsa-miR-324-3p	NM_054033
hsa-miR-29b-1*	NM_054033
hsa-miR-29b	NM_054033
hsa-miR-1915	NM_054033
hsa-miR-15a	NM_054033
hsa-miR-425	NM_004415
hsa-miR-30d	NM_004415
hsa-miR-29c	NM_004415
hsa-miR-21	NM_004415
hsa-miR-20a	NM_004415
hsa-miR-192	NM_004415
hsa-miR-542-3p	NM_138774
hsa-miR-29c	NM_138774
hsa-miR-29b	NM_138774
hsa-miR-196a	NM_138774
hsa-miR-130a	NM_138774
hsa-miR-16-2*	NM_016508
hsa-miR-24	NM_000755
hsa-miR-1915	NM_000755
hsa-miR-96	NM_030628
hsa-miR-542-3p	NM_030628
hsa-miR-20a	NM_030628
hsa-miR-663	NM_000455
hsa-miR-20a	NM_000455
hsa-miR-96	NM_033201
hsa-miR-1915	NM_033201
hsa-miR-29b	NM_004720
hsa-miR-16-2*	NM_005969
hsa-miR-663	NM_013271
hsa-miR-1915	NM_013271
hsa-miR-320c	NM_004394
hsa-miR-320b	NM_004394
hsa-miR-320a	NM_004394
hsa-miR-183	NM_004394
hsa-miR-16-2*	NM_004394
hsa-miR-324-5p	NM_004594
hsa-miR-324-3p	NM_004594
hsa-miR-22	NM_004594
hsa-miR-1915	NM_004594
hsa-miR-15a	NM_004594
hsa-miR-125a-5p	NM_004594
hsa-miR-96	NM_014636
hsa-miR-542-3p	NM_014636
hsa-miR-320d	NM_014636
hsa-miR-320c	NM_014636
hsa-miR-320b	NM_014636
hsa-miR-320a	NM_014636
hsa-miR-30d	NM_014636
hsa-miR-19b	NM_014636
hsa-miR-19a	NM_014636
hsa-miR-196a	NM_014636
hsa-miR-193a-3p	NM_014636
hsa-miR-192	NM_014636
hsa-miR-146a	NM_014636
hsa-miR-130a	NM_014636
hsa-miR-663	NM_005550
hsa-miR-24	NM_005550
hsa-miR-193a-3p	NM_182498
hsa-miR-1915	NM_182498
hsa-miR-10b	NM_182498
hsa-miR-10a	NM_182498
hsa-miR-96	NM_003273
hsa-miR-29b-1*	NM_003273
hsa-miR-542-3p	NM_004350
hsa-miR-210	NM_004350
hsa-miR-20a	NM_004350
hsa-miR-19b	NM_004350
hsa-miR-19a	NM_004350
hsa-miR-130a	NM_004350
hsa-miR-98	NM_002028
hsa-miR-324-3p	NM_002028
hsa-miR-30d	NM_002028
hsa-miR-24	NM_002028
hsa-miR-22	NM_002028
hsa-miR-199b-5p	NM_002028
hsa-miR-192	NM_002028
hsa-miR-146a	NM_002028
hsa-let-7e	NM_002028
hsa-let-7c	NM_002028
hsa-miR-98	NM_170740
hsa-miR-31*	NM_170740
hsa-miR-210	NM_170740
hsa-miR-183	NM_170740
hsa-miR-181b	NM_170740
hsa-let-7e	NM_170740
hsa-miR-663	NM_006688
hsa-miR-30d	NM_006688
hsa-miR-196a	NM_005148
hsa-miR-20a	NM_004203
hsa-miR-98	NM_012395
hsa-miR-92a	NM_012395
hsa-miR-542-3p	NM_012395
hsa-miR-425	NM_012395
hsa-miR-22	NM_012395
hsa-miR-19b	NM_012395
hsa-miR-19a	NM_012395
hsa-miR-199b-5p	NM_012395
hsa-miR-181b	NM_012395
hsa-let-7e	NM_012395
hsa-let-7c	NM_012395
hsa-miR-7	NM_138967
hsa-miR-324-3p	NM_138967
hsa-miR-29c	NM_138967
hsa-miR-29b	NM_138967
hsa-miR-24	NM_138967
hsa-miR-1915	NM_138967
hsa-miR-96	NM_001216
hsa-miR-16-2*	NM_001216
hsa-miR-92a	NM_015187
hsa-miR-7	NM_015187
hsa-miR-425	NM_015187
hsa-miR-30d	NM_015187
hsa-miR-19b	NM_015187
hsa-miR-19a	NM_015187
hsa-miR-199b-5p	NM_015187
hsa-miR-196a	NM_015187
hsa-miR-16-2*	NM_015187
hsa-miR-15a	NM_015187
hsa-miR-146a	NM_015187
hsa-miR-130a	NM_015187
hsa-miR-96	NM_021229
hsa-miR-320d	NM_021229
hsa-miR-320c	NM_021229
hsa-miR-320b	NM_021229
hsa-miR-320a	NM_021229
hsa-miR-29b-1*	NM_021229
hsa-miR-20a	NM_021229
hsa-miR-196a	NM_021229
hsa-miR-183	NM_021229
hsa-miR-16-2*	NM_021229
hsa-miR-98	NM_002829
hsa-miR-96	NM_002829
hsa-miR-425	NM_002829
hsa-miR-20a	NM_002829
hsa-miR-15a	NM_002829
hsa-let-7e	NM_002829
hsa-let-7c	NM_002829
hsa-miR-24	NM_032389
hsa-miR-22	NM_032389
hsa-miR-183	NM_032389
hsa-miR-15a	NM_032389
hsa-miR-125a-5p	NM_032389
hsa-miR-20a	NM_001089
hsa-miR-1915	NM_001089
hsa-miR-30d	NM_005053
hsa-miR-92a	NM_003367
hsa-miR-17*	NM_003367
hsa-miR-10b	NM_003367
hsa-miR-10a	NM_003367
hsa-miR-7	NM_003072
hsa-miR-29b-1*	NM_003072
hsa-miR-210	NM_003072
hsa-miR-331-3p	NM_020895
hsa-miR-20a	NM_020895
hsa-miR-542-3p	NM_006675
hsa-miR-320d	NM_006675
hsa-miR-320c	NM_006675
hsa-miR-320b	NM_006675
hsa-miR-320a	NM_006675
hsa-miR-20a	NM_006675
hsa-miR-15a	NM_006675
hsa-miR-320d	NM_000526
hsa-miR-320c	NM_000526
hsa-miR-320b	NM_000526
hsa-miR-320a	NM_000526
hsa-miR-365	NM_004339
hsa-miR-210	NM_004339
hsa-miR-196a	NM_004339
hsa-miR-192	NM_004339
hsa-let-7e	NM_004339
hsa-miR-98	NM_138578
hsa-miR-30d	NM_138578
hsa-let-7e	NM_138578
hsa-let-7c	NM_138578
hsa-miR-20a	NM_199054
hsa-miR-193a-3p	NM_199054
hsa-miR-192	NM_199054
hsa-miR-10b	NM_199054
hsa-miR-10a	NM_199054
hsa-miR-92a	NM_003204
hsa-miR-22	NM_003204
hsa-miR-20a	NM_003204
hsa-miR-199b-5p	NM_003204
hsa-miR-196a	NM_003204
hsa-miR-193a-3p	NM_003204
hsa-miR-15a	NM_003204
hsa-miR-130a	NM_003204
hsa-miR-331-3p	NM_020039
hsa-miR-324-5p	NM_020039
hsa-miR-324-3p	NM_020039
hsa-miR-19b	NM_020039
hsa-miR-19a	NM_020039
hsa-miR-193a-3p	NM_020039
hsa-miR-130a	NM_020039
hsa-miR-29c	NM_000407
hsa-miR-29b	NM_000407
hsa-miR-324-3p	NM_001567
hsa-miR-29c	NM_001567
hsa-miR-29b	NM_001567
hsa-miR-146a	NM_001567
hsa-miR-96	NM_017607
hsa-miR-92a	NM_017607
hsa-miR-663	NM_017607
hsa-miR-324-3p	NM_017607
hsa-miR-1915	NM_017607
hsa-miR-96	NM_001004125
hsa-miR-331-3p	NM_001004125
hsa-miR-20a	NM_001004125
hsa-miR-16-2*	NM_001004125
hsa-miR-92a	NM_018986
hsa-miR-19b	NM_018986
hsa-miR-19a	NM_018986
hsa-miR-199b-5p	NM_004502
hsa-miR-196a	NM_004502
hsa-miR-324-3p	NM_052853
hsa-miR-22	NM_052853
hsa-miR-324-5p	NM_006753
hsa-miR-324-3p	NM_006753
hsa-miR-21	NM_006753
hsa-miR-31*	NM_020808
hsa-miR-30d	NM_020808
hsa-miR-29c	NM_020808
hsa-miR-29b	NM_020808
hsa-miR-21	NM_020808
hsa-miR-199b-5p	NM_020808
hsa-miR-181b	NM_020808
hsa-miR-15a	NM_020808
hsa-miR-96	NM_000623
hsa-miR-31*	NM_000623
hsa-miR-30d	NM_000623
hsa-miR-1915	NM_000623
hsa-miR-29c	NM_001512
hsa-miR-29b	NM_001512
hsa-miR-193a-3p	NM_001512
hsa-miR-181b	NM_001512
hsa-let-7e	NM_001512
hsa-miR-7	NM_018662
hsa-miR-542-3p	NM_018662
hsa-miR-24	NM_018662
hsa-miR-192	NM_018662
hsa-miR-365	NM_138423
hsa-miR-31*	NM_138423
hsa-miR-29c	NM_138423
hsa-miR-29b-1*	NM_138423
hsa-miR-29b	NM_138423
hsa-miR-20a	NM_138423
hsa-miR-192	NM_138423
hsa-miR-16-2*	NM_138423
hsa-miR-320c	NM_024671
hsa-miR-320b	NM_024671
hsa-miR-320a	NM_024671
hsa-miR-1915	NM_024671
hsa-miR-92a	NM_014214
hsa-miR-21	NM_014214
hsa-miR-125a-5p	NM_014214
hsa-miR-29b-1*	NM_007255
hsa-miR-193a-3p	NM_007255
hsa-miR-92a	NM_015032
hsa-miR-425	NM_015032
hsa-miR-324-3p	NM_015032
hsa-miR-320d	NM_015032
hsa-miR-320c	NM_015032
hsa-miR-30d	NM_015032
hsa-miR-29b-1*	NM_015032
hsa-miR-19b	NM_015032
hsa-miR-19a	NM_015032
hsa-miR-181b	NM_015032
hsa-miR-146a	NM_015032
hsa-miR-130a	NM_015032
hsa-miR-324-3p	NM_001848
hsa-miR-324-3p	NM_174963
hsa-miR-96	NM_152406
hsa-miR-7	NM_152406
hsa-miR-542-3p	NM_152406
hsa-miR-365	NM_152406
hsa-miR-29c	NM_152406
hsa-miR-29b	NM_152406
hsa-miR-130a	NM_152406
hsa-miR-7	NM_001005360
hsa-miR-98	NM_005649
hsa-miR-196a	NM_005649
hsa-let-7e	NM_005649
hsa-let-7c	NM_005649
hsa-miR-324-3p	NM_031300
hsa-miR-199b-5p	NM_030792
hsa-miR-183	NM_030792
hsa-miR-29b-1*	NM_001033053
hsa-miR-29c	NM_001849
hsa-miR-29b	NM_001849
hsa-miR-96	NM_004854
hsa-miR-331-3p	NM_004854
hsa-miR-29b-1*	NM_004854
hsa-miR-24	NM_004854
hsa-miR-663	NM_022152
hsa-miR-542-3p	NM_022152
hsa-miR-324-3p	NM_022152
hsa-miR-22	NM_022152
hsa-miR-130a	NM_022152
hsa-miR-30d	NM_023004
hsa-miR-20a	NM_023004
hsa-miR-10b	NM_023004
hsa-miR-10a	NM_023004
hsa-miR-92a	NM_004747
hsa-miR-7	NM_004747
hsa-miR-30d	NM_004747
hsa-miR-19b	NM_004747
hsa-miR-19a	NM_004747
hsa-miR-192	NM_004747
hsa-miR-181b	NM_004747
hsa-miR-130a	NM_004747
hsa-miR-324-3p	NM_003353
hsa-miR-92a	NM_020223
hsa-miR-425	NM_020223
hsa-miR-542-3p	NM_198402
hsa-miR-365	NM_198402
hsa-miR-29b-1*	NM_198402
hsa-miR-193a-3p	NM_198402
hsa-miR-17*	NM_198402
hsa-miR-16-2*	NM_198402
hsa-miR-15a	NM_198402
hsa-miR-146a	NM_198402
hsa-miR-30d	NM_025268
hsa-miR-7	NM_022823
hsa-miR-331-3p	NM_022823
hsa-miR-199b-5p	NM_022823
hsa-miR-96	NM_021979
hsa-miR-30d	NM_021979
hsa-miR-19b	NM_021979
hsa-miR-19a	NM_021979
hsa-miR-130a	NM_021979
hsa-miR-96	NM_032727
hsa-miR-425	NM_032727
hsa-miR-320d	NM_032727
hsa-miR-320c	NM_032727
hsa-miR-320b	NM_032727
hsa-miR-320a	NM_032727
hsa-miR-19a	NM_032727
hsa-miR-192	NM_032727
hsa-miR-17*	NM_032727
hsa-miR-199b-5p	NM_022059
hsa-miR-16-2*	NM_022059
hsa-miR-29b-1*	NM_018300
hsa-miR-181b	NM_018300
hsa-miR-16-2*	NM_018300
hsa-miR-15a	NM_018300
hsa-miR-10b	NM_018300
hsa-miR-10a	NM_018300
hsa-miR-324-5p	NM_004710
hsa-miR-320d	NM_004710
hsa-miR-320c	NM_004710
hsa-miR-320b	NM_004710
hsa-miR-320a	NM_004710
hsa-miR-96	NM_020856
hsa-miR-7	NM_020856
hsa-miR-425	NM_020856
hsa-miR-324-5p	NM_020856
hsa-miR-320d	NM_020856
hsa-miR-320c	NM_020856
hsa-miR-320b	NM_020856
hsa-miR-320a	NM_020856
hsa-miR-31*	NM_020856
hsa-miR-30d	NM_020856
hsa-miR-29b-1*	NM_020856
hsa-miR-22	NM_020856
hsa-miR-20a	NM_020856
hsa-miR-19b	NM_020856
hsa-miR-19a	NM_020856
hsa-miR-17*	NM_020856
hsa-miR-16-2*	NM_020856
hsa-miR-130a	NM_020856
hsa-miR-125a-5p	NM_020856
hsa-miR-98	NM_001845
hsa-miR-320d	NM_001845
hsa-miR-320c	NM_001845
hsa-miR-320b	NM_001845
hsa-miR-320a	NM_001845
hsa-miR-29c	NM_001845
hsa-miR-29b	NM_001845
hsa-miR-21	NM_001845
hsa-miR-20a	NM_001845
hsa-miR-183	NM_001845
hsa-miR-181b	NM_001845
hsa-miR-15a	NM_001845
hsa-miR-125a-5p	NM_001845
hsa-miR-10b	NM_001845
hsa-miR-10a	NM_001845
hsa-let-7e	NM_001845
hsa-let-7c	NM_001845
hsa-miR-181b	NM_002145
hsa-miR-17*	NM_002145
hsa-miR-16-2*	NM_002145
hsa-miR-125a-5p	NM_002145
hsa-miR-17*	NM_022873
hsa-let-7e	NM_022873
hsa-let-7c	NM_022873
hsa-miR-20a	NM_170601
hsa-miR-181b	NM_170601
hsa-miR-542-3p	NM_015529
hsa-miR-21	NM_015529
hsa-miR-16-2*	NM_015529
hsa-miR-7	NM_000320
hsa-miR-31*	NM_000320
hsa-miR-20a	NM_000320
hsa-miR-181b	NM_000320
hsa-miR-320d	NM_015974
hsa-miR-320c	NM_015974
hsa-miR-320b	NM_015974
hsa-miR-320a	NM_015974
hsa-miR-16-2*	NM_015974
hsa-miR-29c	NM_006700
hsa-miR-29b	NM_006700
hsa-miR-193a-3p	NM_006700
hsa-miR-331-3p	NM_002632
hsa-miR-324-3p	NM_002632
hsa-miR-199b-5p	NM_002632
hsa-miR-1915	NM_002632
hsa-miR-663	NM_002070
hsa-miR-324-3p	NM_002070
hsa-miR-30d	NM_002070
hsa-miR-17*	NM_002070
hsa-miR-98	NM_001761
hsa-miR-30d	NM_001761
hsa-miR-29c	NM_001761
hsa-miR-29b	NM_001761
hsa-miR-1915	NM_001761
hsa-let-7e	NM_001761
hsa-let-7c	NM_001761
hsa-miR-7	NM_006135
hsa-miR-30d	NM_006135
hsa-miR-21	NM_006135
hsa-miR-199b-5p	NM_006135
hsa-miR-196a	NM_006135
hsa-miR-181b	NM_006135
hsa-let-7e	NM_006135
hsa-miR-324-3p	NM_012284
hsa-miR-15a	NM_006711
hsa-miR-96	NM_032777
hsa-miR-7	NM_032777
hsa-miR-663	NM_032777
hsa-miR-324-3p	NM_032777
hsa-miR-320d	NM_032777
hsa-miR-320c	NM_032777
hsa-miR-320b	NM_032777
hsa-miR-320a	NM_032777
hsa-miR-30d	NM_032777
hsa-miR-29b-1*	NM_032777
hsa-miR-22	NM_032777
hsa-miR-183	NM_032777
hsa-miR-181b	NM_032777
hsa-miR-15a	NM_032777
hsa-miR-1915	NM_006494
hsa-miR-15a	NM_006494
hsa-miR-196a	NM_013434
hsa-miR-1915	NM_013434
hsa-miR-324-3p	NM_007223
hsa-miR-20a	NM_007223
hsa-miR-193a-3p	NM_007223
hsa-miR-1915	NM_007223
hsa-miR-320d	NM_002615
hsa-miR-320c	NM_002615
hsa-miR-320b	NM_002615
hsa-miR-320a	NM_002615
hsa-miR-16-2*	NM_002615
hsa-miR-96	NM_005407
hsa-miR-320d	NM_005407
hsa-miR-320c	NM_005407
hsa-miR-320b	NM_005407
hsa-miR-320a	NM_005407
hsa-miR-22	NM_005407
hsa-miR-192	NM_005407
hsa-miR-181b	NM_005407
hsa-miR-146a	NM_005407
hsa-miR-10b	NM_058219
hsa-miR-10a	NM_058219
hsa-miR-98	NM_003749
hsa-miR-92a	NM_003749
hsa-miR-7	NM_003749
hsa-miR-425	NM_003749
hsa-miR-30d	NM_003749
hsa-miR-193a-3p	NM_003749
hsa-miR-181b	NM_003749
hsa-miR-17*	NM_003749
hsa-miR-16-2*	NM_003749
hsa-miR-15a	NM_003749
hsa-miR-126	NM_003749
hsa-let-7e	NM_003749
hsa-let-7c	NM_003749
hsa-miR-92a	NM_002473
hsa-miR-542-3p	NM_002473
hsa-miR-365	NM_002473
hsa-miR-199b-5p	NM_002473
hsa-miR-663	NM_001039140
hsa-miR-1915	NM_016332
hsa-miR-92a	NM_006959
hsa-miR-324-3p	NM_015675
hsa-miR-130a	NM_015675
hsa-miR-365	NM_002862
hsa-miR-331-3p	NM_002862
hsa-miR-19b	NM_002862
hsa-miR-19a	NM_002862
hsa-miR-17*	NM_002862
hsa-miR-92a	NM_174921
hsa-miR-425	NM_174921
hsa-miR-324-5p	NM_174921
hsa-miR-30d	NM_174921
hsa-miR-21	NM_174921
hsa-miR-193a-3p	NM_174921
hsa-miR-181b	NM_174921
hsa-miR-29b-1*	NM_003827
hsa-miR-663	NM_018649
hsa-miR-320d	NM_018649
hsa-miR-320c	NM_018649
hsa-miR-320b	NM_018649
hsa-miR-320a	NM_018649
hsa-miR-29c	NM_018649
hsa-miR-29b	NM_018649
hsa-miR-20a	NM_018649
hsa-miR-193a-3p	NM_014972
hsa-miR-183	NM_005345
hsa-miR-146a	NM_005345
hsa-miR-125a-5p	NM_005345
hsa-miR-365	NM_003011
hsa-miR-30d	NM_003011
hsa-miR-29c	NM_003011
hsa-miR-29b	NM_003011
hsa-miR-21	NM_003011
hsa-miR-20a	NM_003011
hsa-miR-199b-5p	NM_003011
hsa-miR-1915	NM_003011
hsa-miR-125a-5p	NM_003011
hsa-miR-29c	NM_133446
hsa-miR-29b	NM_133446
hsa-miR-17*	NM_133446
hsa-miR-98	NM_006969
hsa-miR-92a	NM_006969
hsa-miR-29c	NM_006969
hsa-miR-29b	NM_006969
hsa-miR-199b-5p	NM_006969
hsa-miR-196a	NM_006969
hsa-miR-181b	NM_006969
hsa-miR-17*	NM_006969
hsa-let-7e	NM_006969
hsa-let-7c	NM_006969
hsa-miR-331-3p	NM_018370
hsa-miR-324-5p	NM_018370
hsa-miR-199b-5p	NM_018370
hsa-miR-15a	NM_018370
hsa-miR-10b	NM_018370
hsa-miR-10a	NM_018370
hsa-miR-320d	NM_018035
hsa-miR-320c	NM_018035
hsa-miR-320b	NM_018035
hsa-miR-320a	NM_018035
hsa-miR-21	NM_018035
hsa-miR-24	NM_007024
hsa-miR-193a-3p	NM_007024
hsa-miR-146a	NM_007024
hsa-miR-663	NM_015085
hsa-miR-196a	NM_015085
hsa-miR-181b	NM_015085
hsa-miR-331-3p	AK074567
hsa-miR-20a	AK074567
hsa-miR-193a-3p	AK074567
hsa-miR-192	AK074567
hsa-miR-15a	AK074567
hsa-miR-24	NM_024043
hsa-miR-542-3p	NM_017425
hsa-miR-425	NM_017425
hsa-miR-30d	NM_017425
hsa-miR-21	NM_017425
hsa-miR-199b-5p	NM_017425
hsa-miR-7	NM_030760
hsa-miR-29b-1*	NM_030760
hsa-miR-24	NM_030760
hsa-miR-10b	NM_030760
hsa-miR-10a	NM_030760
hsa-miR-98	NM_005338
hsa-miR-7	NM_005338
hsa-miR-320d	NM_005338
hsa-miR-320c	NM_005338
hsa-miR-30d	NM_005338
hsa-miR-19b	NM_005338
hsa-miR-19a	NM_005338
hsa-miR-15a	NM_005338
hsa-miR-30d	NM_024069
hsa-miR-24	NM_024069
hsa-miR-20a	NM_032272
hsa-miR-425	NM_003641
hsa-miR-19b	NM_003641
hsa-miR-19a	NM_003641
hsa-miR-98	NM_020131
hsa-miR-7	NM_020131
hsa-miR-30d	NM_020131
hsa-miR-20a	NM_020131
hsa-miR-146a	NM_020131
hsa-let-7e	NM_020131
hsa-let-7c	NM_020131
hsa-miR-92a	NM_138799
hsa-miR-320d	NM_138799
hsa-miR-320c	NM_138799
hsa-miR-320b	NM_138799
hsa-miR-320a	NM_138799
hsa-miR-21	NM_138799
hsa-miR-181b	NM_138799
hsa-miR-17*	NM_138799
hsa-miR-16-2*	NM_138799
hsa-miR-425	NM_003299
hsa-miR-19b	NM_003299
hsa-miR-19a	NM_003299
hsa-miR-181b	NM_003299
hsa-miR-130a	NM_003299
hsa-miR-92a	NM_000138
hsa-miR-7	NM_000138
hsa-miR-542-3p	NM_000138
hsa-miR-425	NM_000138
hsa-miR-29c	NM_000138
hsa-miR-29b-1*	NM_000138
hsa-miR-29b	NM_000138
hsa-miR-24	NM_000138
hsa-miR-20a	NM_000138
hsa-miR-19b	NM_000138
hsa-miR-19a	NM_000138
hsa-miR-192	NM_000138
hsa-miR-16-2*	NM_000138
hsa-miR-130a	NM_000138
hsa-miR-663	NM_001610
hsa-miR-542-3p	NM_001610
hsa-miR-331-3p	NM_001610
hsa-miR-324-3p	NM_001610
hsa-miR-30d	NM_001610
hsa-miR-29c	NM_001610
hsa-miR-29b	NM_001610
hsa-miR-199b-5p	NM_001610
hsa-miR-181b	NM_001610
hsa-miR-15a	NM_001610
hsa-miR-130a	NM_001610
hsa-miR-663	NM_004468
hsa-miR-324-3p	NM_004468
hsa-miR-10b	NM_004468
hsa-miR-10a	NM_004468
hsa-miR-663	NM_003969
hsa-miR-92a	NM_003655
hsa-miR-542-3p	NM_003655
hsa-miR-29b-1*	NM_003655
hsa-miR-21	NM_003655
hsa-miR-181b	NM_003655
hsa-miR-16-2*	NM_003655
hsa-miR-15a	NM_003655
hsa-miR-425	NM_006423
hsa-miR-30d	NM_013392
hsa-miR-29c	NM_013392
hsa-miR-29b	NM_013392
hsa-miR-20a	NM_013392
hsa-miR-19b	NM_013392
hsa-miR-19a	NM_013392
hsa-miR-15a	NM_013392
hsa-miR-181b	NM_017905
hsa-miR-16-2*	NM_017905
hsa-miR-92a	NM_194272
hsa-miR-542-3p	NM_194272
hsa-miR-1915	NM_194272
hsa-miR-17*	NM_194272
hsa-miR-30d	NM_003692
hsa-miR-29c	NM_003692
hsa-miR-29b	NM_003692
hsa-miR-19b	NM_003692
hsa-miR-19a	NM_003692
hsa-miR-199b-5p	NM_003692
hsa-miR-181b	NM_003692
hsa-miR-16-2*	NM_003692
hsa-miR-15a	NM_003692
hsa-miR-199b-5p	NM_002856
hsa-miR-22	NM_021831
hsa-miR-663	NM_014225
hsa-miR-542-3p	NM_014225
hsa-miR-425	NM_014225
hsa-miR-199b-5p	NM_014225
hsa-miR-15a	NM_014225
hsa-miR-663	NM_002180
hsa-miR-24	NM_002180
hsa-miR-199b-5p	NM_002180
hsa-miR-125a-5p	NM_002180
hsa-miR-331-3p	NM_005273
hsa-miR-1915	NM_005273
hsa-miR-192	NM_006351
hsa-miR-24	NM_012321
hsa-miR-20a	NM_012321
hsa-miR-199b-5p	NM_012321
hsa-miR-17*	NM_012321
hsa-miR-31*	NM_020909
hsa-miR-30d	NM_020909
hsa-miR-21	NM_020909
hsa-miR-20a	NM_020909
hsa-miR-19b	NM_020909
hsa-miR-19a	NM_020909
hsa-miR-130a	NM_020909
hsa-miR-663	NM_002917
hsa-miR-146a	NM_002917
hsa-miR-130a	NM_001805
hsa-miR-98	NM_020834
hsa-miR-324-3p	NM_020834
hsa-miR-29b-1*	NM_020834
hsa-miR-20a	NM_020834
hsa-miR-196a	NM_020834
hsa-miR-16-2*	NM_020834
hsa-miR-125a-5p	NM_020834
hsa-let-7e	NM_020834
hsa-let-7c	NM_020834
hsa-miR-7	NM_017510
hsa-miR-29c	NM_017510
hsa-miR-29b	NM_017510
hsa-miR-1915	NM_017510
hsa-miR-7	NM_001993
hsa-miR-365	NM_001993
hsa-miR-320d	NM_001993
hsa-miR-320c	NM_001993
hsa-miR-320b	NM_001993
hsa-miR-320a	NM_001993
hsa-miR-21	NM_001993
hsa-miR-20a	NM_001993
hsa-miR-19b	NM_001993
hsa-miR-19a	NM_001993
hsa-miR-16-2*	NM_001993
hsa-miR-130a	NM_001993
hsa-miR-30d	NM_001001701
hsa-miR-192	NM_001001701
hsa-miR-146a	NM_001001701
hsa-miR-542-3p	NM_002852
hsa-miR-29c	NM_002852
hsa-miR-29b	NM_002852
hsa-miR-21	NM_002852
hsa-miR-199b-5p	NM_002852
hsa-miR-193a-3p	NM_002852
hsa-miR-181b	NM_002852
hsa-miR-16-2*	NM_002852
hsa-miR-663	NM_025241
hsa-miR-98	NM_000945
hsa-miR-96	NM_000945
hsa-miR-425	NM_000945
hsa-miR-320d	NM_000945
hsa-miR-320c	NM_000945
hsa-miR-320b	NM_000945
hsa-miR-320a	NM_000945
hsa-miR-30d	NM_000945
hsa-miR-29c	NM_000945
hsa-miR-29b	NM_000945
hsa-miR-22	NM_000945
hsa-miR-21	NM_000945
hsa-miR-20a	NM_000945
hsa-miR-19b	NM_000945
hsa-miR-19a	NM_000945
hsa-miR-196a	NM_000945
hsa-miR-181b	NM_000945
hsa-miR-16-2*	NM_000945
hsa-miR-10b	NM_000945
hsa-let-7e	NM_000945
hsa-let-7c	NM_000945
hsa-miR-331-3p	NM_080821
hsa-miR-320d	NM_080821
hsa-miR-320c	NM_080821
hsa-miR-320b	NM_080821
hsa-miR-320a	NM_080821
hsa-miR-30d	NM_080821
hsa-miR-24	NM_080821
hsa-miR-192	NM_080821
hsa-miR-183	NM_080821
hsa-miR-15a	NM_001236
hsa-miR-92a	NM_178841
hsa-miR-365	NM_178841
hsa-miR-1915	NM_178841
hsa-miR-16-2*	NM_178841
hsa-miR-125a-5p	NM_178841
hsa-miR-320d	NM_001904
hsa-miR-320c	NM_001904
hsa-miR-320b	NM_001904
hsa-miR-320a	NM_001904
hsa-miR-19b	NM_001904
hsa-miR-19a	NM_001904
hsa-miR-130a	NM_001904
hsa-miR-542-3p	NM_024656
hsa-miR-181b	NM_024656
hsa-miR-16-2*	NM_024656
hsa-let-7e	NM_024656
hsa-miR-663	NM_032780
hsa-miR-331-3p	NM_032780
hsa-miR-20a	NM_032780
hsa-miR-19b	NM_032780
hsa-miR-19a	NM_032780
hsa-miR-183	NM_032780
hsa-miR-16-2*	NM_032780
hsa-miR-30d	NM_019105
hsa-miR-96	NM_022737
hsa-miR-663	NM_022737
hsa-miR-24	NM_022737
hsa-miR-183	NM_022737
hsa-miR-98	NM_020784
hsa-miR-425	NM_020784
hsa-miR-29c	NM_020784
hsa-miR-29b-1*	NM_020784
hsa-miR-29b	NM_020784
hsa-miR-24	NM_020784
hsa-miR-183	NM_020784
hsa-miR-125a-5p	NM_020784
hsa-let-7c	NM_020784
hsa-miR-19b	NM_001950
hsa-miR-19a	NM_001950
hsa-miR-425	NM_003748
hsa-miR-365	NM_003423
hsa-miR-21	NM_003423
hsa-miR-16-2*	NM_003423
hsa-miR-10b	NM_003423
hsa-miR-10a	NM_003423
hsa-let-7e	NM_003423
hsa-let-7c	NM_003423
hsa-miR-324-3p	NM_153360
hsa-miR-320d	NM_153360
hsa-miR-320c	NM_153360
hsa-miR-320b	NM_153360
hsa-miR-320a	NM_153360
hsa-miR-22	NM_153360
hsa-miR-183	NM_153360
hsa-miR-99b	NM_175039
hsa-miR-100	NM_175039
hsa-miR-92a	NM_020066
hsa-miR-7	NM_020066
hsa-miR-365	NM_020066
hsa-miR-29b-1*	NM_020066
hsa-miR-130a	NM_020066
hsa-miR-542-3p	NM_001630
hsa-miR-10b	NM_001630
hsa-miR-10a	NM_001630
hsa-miR-92a	NM_024908
hsa-miR-320d	NM_024908
hsa-miR-320c	NM_024908
hsa-miR-320b	NM_024908
hsa-miR-320a	NM_024908
hsa-miR-30d	NM_024908
hsa-miR-10b	NM_024908
hsa-miR-10a	NM_024908
hsa-miR-29c	NM_003575
hsa-miR-29b-1*	NM_003575
hsa-miR-29b	NM_003575
hsa-miR-210	NM_003575
hsa-miR-92a	NM_017519
hsa-miR-20a	NM_017519
hsa-miR-192	NM_017519
hsa-miR-181b	NM_017519
hsa-miR-16-2*	NM_017519
hsa-miR-7	NM_019009
hsa-miR-20a	NM_019009
hsa-miR-199b-5p	NM_019009
hsa-miR-98	NM_016352
hsa-miR-7	NM_016352
hsa-miR-21	NM_016352
hsa-miR-16-2*	NM_016352
hsa-miR-10b	NM_016352
hsa-miR-10a	NM_016352
hsa-let-7e	NM_016352
hsa-let-7c	NM_016352
hsa-miR-15a	NM_001823
hsa-miR-96	NM_001008401
hsa-miR-29c	NM_001008401
hsa-miR-29b	NM_001008401
hsa-miR-199b-5p	NM_001008401
hsa-miR-16-2*	NM_001008401
hsa-miR-146a	NM_001008401
hsa-miR-10a	NM_001008401
hsa-miR-365	NM_182961
hsa-miR-324-3p	NM_182961
hsa-miR-320d	NM_182961
hsa-miR-320c	NM_182961
hsa-miR-320b	NM_182961
hsa-miR-320a	NM_182961
hsa-miR-29c	NM_182961
hsa-miR-29b	NM_182961
hsa-miR-22	NM_182961
hsa-miR-20a	NM_182961
hsa-miR-19b	NM_182961
hsa-miR-19a	NM_182961
hsa-miR-181b	NM_182961
hsa-miR-15a	NM_182961
hsa-miR-130a	NM_182961
hsa-miR-96	NM_080836
hsa-miR-7	NM_080836
hsa-miR-425	NM_080836
hsa-miR-30d	NM_080836
hsa-miR-29b-1*	NM_080836
hsa-miR-19b	NM_080836
hsa-miR-19a	NM_080836
hsa-miR-331-3p	NM_001458
hsa-miR-320d	NM_001458
hsa-miR-320c	NM_001458
hsa-miR-320b	NM_001458
hsa-miR-320a	NM_001458
hsa-miR-210	NM_001458
hsa-miR-19b	NM_001458
hsa-miR-19a	NM_001458
hsa-miR-192	NM_001458
hsa-miR-1915	NM_001458
hsa-miR-7	NM_005026
hsa-miR-324-5p	NM_005026
hsa-miR-320d	NM_005026
hsa-miR-320c	NM_005026
hsa-miR-320b	NM_005026
hsa-miR-320a	NM_005026
hsa-miR-30d	NM_005026
hsa-miR-20a	NM_005026
hsa-miR-199b-5p	NM_005026
hsa-miR-10a	NM_005026
hsa-miR-98	NM_006989
hsa-miR-181b	NM_006989
hsa-let-7e	NM_006989
hsa-let-7c	NM_006989
hsa-miR-542-3p	NM_133452
hsa-miR-92a	NM_001964
hsa-miR-19b	NM_001964
hsa-miR-19a	NM_001964
hsa-miR-192	NM_001964
hsa-miR-1915	NM_001964
hsa-miR-183	NM_001964
hsa-miR-181b	NM_001964
hsa-miR-24	NM_021260
hsa-miR-181b	NM_021260
hsa-miR-125a-5p	NM_021260
hsa-miR-24	NM_153685
hsa-miR-19b	NM_153685
hsa-miR-19a	NM_153685
hsa-miR-183	NM_153685
hsa-miR-130a	NM_153685
hsa-miR-542-3p	NM_003938
hsa-miR-29c	NM_003793
hsa-miR-29b	NM_003793
hsa-miR-98	NM_183376
hsa-miR-96	NM_183376
hsa-miR-92a	NM_183376
hsa-miR-425	NM_183376
hsa-miR-30d	NM_183376
hsa-miR-29c	NM_183376
hsa-miR-29b	NM_183376
hsa-miR-19b	NM_183376
hsa-miR-19a	NM_183376
hsa-miR-183	NM_183376
hsa-miR-181b	NM_183376
hsa-miR-15a	NM_183376
hsa-let-7e	NM_183376
hsa-let-7c	NM_183376
hsa-miR-96	NM_002736
hsa-miR-92a	NM_002736
hsa-miR-20a	NM_002736
hsa-miR-10a	NM_002736
hsa-miR-29b-1*	NM_024028
hsa-miR-196a	NM_024028
hsa-miR-193a-3p	NM_024028
hsa-miR-15a	NM_024028
hsa-miR-16-2*	NM_021168
hsa-miR-15a	NM_152495
hsa-miR-146a	NM_152495
hsa-miR-125a-5p	NM_152495
hsa-miR-29c	NM_024989
hsa-miR-29b	NM_024989
hsa-miR-30d	NM_021958
hsa-miR-331-3p	NM_130468
hsa-miR-324-3p	NM_130468
hsa-miR-29b-1*	NM_130468
hsa-miR-146a	NM_130468
hsa-miR-320d	NM_024907
hsa-miR-320c	NM_024907
hsa-miR-320b	NM_024907
hsa-miR-320a	NM_024907
hsa-miR-29b-1*	NM_024907
hsa-miR-181b	NM_024907
hsa-miR-15a	NM_024907
hsa-miR-7	NM_004598
hsa-miR-22	NM_004598
hsa-miR-21	NM_004598
hsa-miR-19b	NM_004598
hsa-miR-19a	NM_004598
hsa-miR-1915	NM_004598
hsa-miR-181b	NM_004598
hsa-miR-16-2*	NM_004598
hsa-miR-130a	NM_004598
hsa-miR-10b	NM_004598
hsa-miR-10a	NM_004598
hsa-miR-96	NM_001024736
hsa-miR-324-3p	NM_001024736
hsa-miR-29c	NM_001024736
hsa-miR-29b	NM_001024736
hsa-miR-146a	NM_001024736
hsa-let-7e	NM_001024736
hsa-let-7c	NM_001024736
hsa-miR-30d	NM_002819
hsa-miR-16-2*	NM_002819
hsa-miR-21	NM_002821
hsa-miR-19b	NM_002821
hsa-miR-19a	NM_002821
hsa-miR-15a	NM_002821
hsa-miR-10b	NM_002821
hsa-miR-10a	NM_002821
hsa-miR-425	NM_017636
hsa-miR-199b-5p	NM_017636
hsa-miR-324-5p	NM_020350
hsa-miR-125a-5p	NM_020350
hsa-miR-7	NM_181786
hsa-miR-24	NM_181786
hsa-miR-425	NM_021947
hsa-miR-324-3p	NM_021947
hsa-miR-183	NM_021947
hsa-miR-17*	NM_021947
hsa-miR-320d	NM_002673
hsa-miR-320c	NM_002673
hsa-miR-320b	NM_002673
hsa-miR-320a	NM_002673
hsa-miR-199b-5p	NM_002673
hsa-miR-15a	NM_002673
hsa-let-7e	NM_002673
hsa-miR-24	NM_002778
hsa-miR-210	NM_002778
hsa-miR-19b	NM_002778
hsa-miR-19a	NM_002778
hsa-miR-181b	NM_002778
hsa-miR-130a	NM_002778
hsa-miR-542-3p	NM_001003682
hsa-miR-324-3p	NM_001003682
hsa-miR-24	NM_001003682
hsa-miR-92a	NM_032815
hsa-miR-320d	NM_032815
hsa-miR-320c	NM_032815
hsa-miR-320b	NM_032815
hsa-miR-320a	NM_032815
hsa-miR-29c	NM_032815
hsa-miR-29b	NM_032815
hsa-miR-20a	NM_032815
hsa-miR-19a	NM_032815
hsa-miR-199b-5p	NM_032815
hsa-miR-196a	NM_032815
hsa-miR-192	NM_032815
hsa-miR-181b	NM_032815
hsa-miR-16-2*	NM_032815
hsa-miR-146a	NM_032815
hsa-miR-331-3p	NM_001015053
hsa-miR-324-3p	NM_001015053
hsa-miR-30d	NM_001015053
hsa-miR-663	NM_002461
hsa-miR-29b-1*	NM_002461
hsa-miR-146a	NM_002461
hsa-miR-320d	NM_004927
hsa-miR-320c	NM_004927
hsa-miR-320b	NM_004927
hsa-miR-320a	NM_004927
hsa-miR-21	NM_004927
hsa-miR-19b	NM_004927
hsa-miR-19a	NM_004927
hsa-miR-16-2*	NM_004927
hsa-miR-425	NM_000288
hsa-miR-21	NM_000288
hsa-miR-7	NM_003896
hsa-miR-22	NM_003896
hsa-miR-210	NM_003896
hsa-miR-19b	NM_003896
hsa-miR-19a	NM_003896
hsa-miR-192	NM_003896
hsa-miR-1915	NM_003896
hsa-miR-17*	NM_003896
hsa-miR-425	NM_138448
hsa-miR-30d	NM_138448
hsa-miR-29b-1*	NM_138448
hsa-miR-199b-5p	NM_138448
hsa-miR-16-2*	NM_138448
hsa-miR-21	NM_000747
hsa-miR-193a-3p	NM_000747
hsa-miR-17*	NM_000747
hsa-miR-193a-3p	NM_017727
hsa-miR-146a	NM_017727
hsa-let-7e	NM_017727
hsa-miR-7	NM_000687
hsa-miR-29b-1*	NM_000687
hsa-miR-24	NM_000687
hsa-miR-1915	NM_000687
hsa-miR-15a	NM_014747
hsa-miR-331-3p	NM_002616
hsa-miR-24	NM_002616
hsa-miR-22	NM_002883
hsa-miR-196a	NM_002883
hsa-miR-96	NM_002541
hsa-miR-24	NM_002541
hsa-miR-22	NM_002541
hsa-miR-183	NM_002541
hsa-miR-30d	NM_005358
hsa-miR-196a	NM_005358
hsa-miR-181b	NM_005358
hsa-miR-16-2*	NM_005358
hsa-miR-15a	NM_005358
hsa-miR-146a	NM_005358
hsa-miR-98	NM_000546
hsa-miR-24	NM_000546
hsa-miR-22	NM_000546
hsa-miR-19b	NM_000546
hsa-miR-19a	NM_000546
hsa-miR-125a-5p	NM_000546
hsa-let-7e	NM_000546
hsa-let-7c	NM_000546
hsa-miR-24	NM_005740
hsa-miR-22	NM_005740
hsa-miR-10b	NM_005740
hsa-miR-10a	NM_005740
hsa-miR-92a	NM_005159
hsa-miR-7	NM_005159
hsa-miR-324-3p	NM_005159
hsa-miR-30d	NM_005159
hsa-miR-29b-1*	NM_005159
hsa-miR-199b-5p	NM_005159
hsa-miR-181b	NM_005159
hsa-miR-16-2*	NM_005159
hsa-miR-146a	NM_005159
hsa-miR-130a	NM_005159
hsa-miR-324-3p	NM_032832
hsa-miR-320d	NM_032832
hsa-miR-320c	NM_032832
hsa-miR-320b	NM_032832
hsa-miR-320a	NM_032832
hsa-miR-30d	NM_032832
hsa-miR-29b-1*	NM_032832
hsa-miR-20a	NM_032832
hsa-miR-183	NM_032832
hsa-miR-181b	NM_032832
hsa-let-7e	NM_032832
hsa-let-7c	NM_032832
hsa-miR-92a	NM_014062
hsa-miR-196a	NM_014062
hsa-miR-192	NM_014062
hsa-miR-15a	NM_014062
hsa-miR-125a-5p	NM_014062
hsa-miR-324-3p	NM_031921
hsa-miR-24	NM_020944
hsa-miR-181b	NM_020944
hsa-miR-15a	NM_002346
hsa-miR-29b-1*	NM_024590
hsa-miR-20a	NM_024590
hsa-miR-196a	NM_024590
hsa-miR-181b	NM_024590
hsa-miR-10b	NM_024590
hsa-miR-10a	NM_024590
hsa-let-7e	NM_024590
hsa-miR-324-3p	NM_198525
hsa-miR-29b-1*	NM_198525
hsa-miR-98	NM_022039
hsa-miR-24	NM_022039
hsa-miR-125a-5p	NM_022039
hsa-let-7e	NM_022039
hsa-let-7c	NM_022039
hsa-miR-425	NM_152713
hsa-miR-22	NM_015600
hsa-miR-130a	NM_015600
hsa-miR-542-3p	NM_025263
hsa-miR-29c	NM_025263
hsa-miR-29b-1*	NM_025263
hsa-miR-29b	NM_025263
hsa-miR-181b	NM_025263
hsa-miR-146a	NM_025263
hsa-miR-125a-5p	NM_025263
hsa-miR-92a	NM_015125
hsa-miR-324-3p	NM_015125
hsa-miR-20a	NM_015125
hsa-miR-542-3p	NM_015995
hsa-miR-324-3p	NM_015995
hsa-miR-320d	NM_015995
hsa-miR-320c	NM_015995
hsa-miR-320b	NM_015995
hsa-miR-320a	NM_015995
hsa-miR-21	NM_015995
hsa-miR-7	NM_012304
hsa-miR-542-3p	NM_012304
hsa-miR-29b	NM_012304
hsa-miR-20a	NM_012304
hsa-miR-196a	NM_012304
hsa-miR-96	NM_182898
hsa-miR-365	NM_182898
hsa-miR-320d	NM_182898
hsa-miR-320c	NM_182898
hsa-miR-320b	NM_182898
hsa-miR-320a	NM_182898
hsa-miR-31*	NM_182898
hsa-miR-20a	NM_182898
hsa-miR-130a	NM_182898
hsa-miR-20a	NM_020158
hsa-miR-542-3p	NM_198457
hsa-miR-96	NM_005766
hsa-miR-92a	NM_005766
hsa-miR-542-3p	NM_005766
hsa-miR-425	NM_005766
hsa-miR-29b	NM_005766
hsa-miR-193a-3p	NM_005766
hsa-miR-425	NM_007371
hsa-miR-365	NM_007371
hsa-miR-320d	NM_007371
hsa-miR-320c	NM_007371
hsa-miR-320b	NM_007371
hsa-miR-320a	NM_007371
hsa-miR-30d	NM_007371
hsa-miR-210	NM_007371
hsa-miR-199b-5p	NM_007371
hsa-miR-192	NM_007371
hsa-miR-16-2*	NM_001485
hsa-miR-1915	NM_198993
hsa-miR-15a	NM_198993
hsa-miR-22	NM_005186
hsa-miR-17*	NM_004722
hsa-miR-7	NM_033386
hsa-miR-324-5p	NM_033386
hsa-miR-21	NM_033386
hsa-miR-17*	NM_033386
hsa-miR-125a-5p	NM_033386
hsa-miR-98	NM_024312
hsa-miR-7	NM_024312
hsa-miR-20a	NM_024312
hsa-miR-19b	NM_024312
hsa-miR-19a	NM_024312
hsa-miR-17*	NM_024312
hsa-miR-16-2*	NM_024312
hsa-miR-130a	NM_024312
hsa-let-7e	NM_024312
hsa-let-7c	NM_024312
hsa-miR-425	NM_004687
hsa-miR-29c	NM_004687
hsa-miR-29b-1*	NM_004687
hsa-miR-29b	NM_004687
hsa-miR-24	NM_004687
hsa-miR-22	NM_004687
hsa-miR-20a	NM_004687
hsa-miR-19b	NM_004687
hsa-miR-19a	NM_004687
hsa-miR-192	NM_004687
hsa-miR-181b	NM_004687
hsa-miR-15a	NM_004687
hsa-miR-130a	NM_004687
hsa-miR-92a	NM_003216
hsa-miR-199b-5p	NM_003216
hsa-miR-1915	NM_003216
hsa-miR-324-3p	NM_014551
hsa-miR-98	NM_001034
hsa-miR-30d	NM_001034
hsa-miR-20a	NM_001034
hsa-miR-199b-5p	NM_001034
hsa-miR-181b	NM_001034
hsa-miR-125a-5p	NM_001034
hsa-let-7e	NM_001034
hsa-let-7c	NM_001034
hsa-miR-96	NM_001846
hsa-miR-29c	NM_001846
hsa-miR-29b-1*	NM_001846
hsa-miR-29b	NM_001846
hsa-miR-20a	NM_001846
hsa-miR-192	NM_001846
hsa-miR-192	NM_016606
hsa-miR-92a	NM_015439
hsa-miR-193a-3p	NM_015439
hsa-miR-15a	NM_015439
hsa-miR-10a	NM_015439
hsa-miR-542-3p	NM_020657
hsa-miR-20a	NM_020657
hsa-miR-1915	NM_020657
hsa-miR-15a	NM_020657
hsa-miR-130a	NM_020657
hsa-miR-125a-5p	NM_020657
hsa-miR-30d	NM_002519
hsa-miR-24	NM_002519
hsa-miR-20a	NM_002519
hsa-miR-19b	NM_002519
hsa-miR-19a	NM_002519
hsa-miR-181b	NM_002519
hsa-miR-17*	NM_002519
hsa-miR-146a	NM_002519
hsa-miR-130a	NM_002519
hsa-miR-10b	NM_002519
hsa-miR-10a	NM_002519
hsa-miR-7	NM_006646
hsa-miR-542-3p	NM_006646
hsa-miR-31*	NM_006646
hsa-miR-20a	NM_006646
hsa-miR-146a	NM_006646
hsa-miR-24	NM_144564
hsa-miR-96	NM_014988
hsa-miR-425	NM_014988
hsa-miR-320d	NM_014988
hsa-miR-320c	NM_014988
hsa-miR-320b	NM_014988
hsa-miR-320a	NM_014988
hsa-miR-30d	NM_014988
hsa-miR-22	NM_014988
hsa-miR-19b	NM_014988
hsa-miR-19a	NM_014988
hsa-miR-193a-3p	NM_014988
hsa-miR-192	NM_014988
hsa-miR-181b	NM_014988
hsa-miR-16-2*	NM_014988
hsa-miR-146a	NM_014988
hsa-miR-324-3p	NM_015266
hsa-miR-30d	NM_015266
hsa-miR-21	NM_015266
hsa-miR-199b-5p	NM_015266
hsa-miR-15a	NM_015266
hsa-miR-331-3p	NM_006486
hsa-miR-324-3p	NM_006486
hsa-miR-24	NM_006486
hsa-miR-20a	NM_006486
hsa-miR-98	NM_001007246
hsa-miR-96	NM_001007246
hsa-miR-7	NM_001007246
hsa-miR-542-3p	NM_001007246
hsa-miR-324-5p	NM_001007246
hsa-miR-31*	NM_001007246
hsa-miR-20a	NM_001007246
hsa-miR-193a-3p	NM_001007246
hsa-miR-192	NM_001007246
hsa-miR-181b	NM_001007246
hsa-miR-15a	NM_001007246
hsa-miR-10b	NM_001007246
hsa-miR-10a	NM_001007246
hsa-let-7e	NM_001007246
hsa-let-7c	NM_001007246
hsa-miR-92a	NM_019850
hsa-miR-29c	NM_018011
hsa-miR-29b-1*	NM_018011
hsa-miR-29b	NM_018011
hsa-miR-21	NM_018011
hsa-miR-663	NM_005589
hsa-miR-320d	NM_005589
hsa-miR-320c	NM_005589
hsa-miR-320b	NM_005589
hsa-miR-320a	NM_005589
hsa-miR-30d	NM_005589
hsa-miR-29b-1*	NM_005589
hsa-miR-92a	NM_003183
hsa-miR-29c	NM_003183
hsa-miR-29b	NM_003183
hsa-miR-199b-5p	NM_003183
hsa-miR-16-2*	NM_003183
hsa-miR-425	NM_016441
hsa-miR-365	NM_016441
hsa-miR-331-3p	NM_016441
hsa-miR-324-3p	NM_016441
hsa-miR-29b-1*	NM_016441
hsa-miR-29b	NM_016441
hsa-miR-22	NM_016441
hsa-miR-21	NM_016441
hsa-miR-20a	NM_016441
hsa-miR-199b-5p	NM_016441
hsa-miR-181b	NM_016441
hsa-miR-17*	NM_016441
hsa-miR-16-2*	NM_016441
hsa-miR-15a	NM_016441
hsa-miR-21	NM_001663
hsa-miR-20a	NM_001663
hsa-miR-199b-5p	NM_001663
hsa-miR-181b	NM_001663
hsa-miR-17*	NM_001663
hsa-miR-16-2*	NM_001663
hsa-miR-146a	NM_001663
hsa-miR-130a	NM_001663
hsa-miR-98	NM_173462
hsa-miR-365	NM_173462
hsa-miR-324-3p	NM_173462
hsa-miR-199b-5p	NM_173462
hsa-miR-16-2*	NM_173462
hsa-let-7e	NM_173462
hsa-miR-96	NM_007039
hsa-miR-29b-1*	NM_007039
hsa-miR-210	NM_007039
hsa-miR-20a	NM_007039
hsa-miR-193a-3p	NM_007039
hsa-miR-16-2*	NM_007039
hsa-miR-146a	NM_007039
hsa-miR-29c	NM_002730
hsa-miR-10b	NM_002730
hsa-miR-10a	NM_002730
hsa-miR-98	NM_005051
hsa-let-7e	NM_005051
hsa-let-7c	NM_005051
hsa-miR-320d	NM_133334
hsa-miR-320c	NM_133334
hsa-miR-320b	NM_133334
hsa-miR-320a	NM_133334
hsa-miR-196a	NM_133334
hsa-miR-15a	NM_133334
[truncated: 6,497 more rows]
